# Supplementary material for: Global Distribution Patterns of Carbapenemase-Encoding Bacteria in a New Light: Clues on a Role for Ethnicity
Source: PubMed Central journal article supplement (PMC8276097; doi:10.3389/fcimb.2021.659753), 2021-06-29
Supplement: DataSheet_1.pdf [file DataSheet_1.pdf]

## Appendix A Additional Tables and Figures

Table A1: Table CEB

| Year  | Number of Genotyped Isolates | Number of Detected CEB |
|-------|------------------------------|------------------------|
| 2014  | 96                           | 21                     |
| 2015  | 406                          | 88                     |
| 2016  | 325                          | 79                     |
| 2017  | 309                          | 61                     |
| 2018  | 349                          | 56                     |
| 2019  | 432                          | 92                     |
| Total | 1917                         | 397                    |

Figure A1: Number of detected carbapenemases each year between 2015 and 2019 highlighting the overall trend.

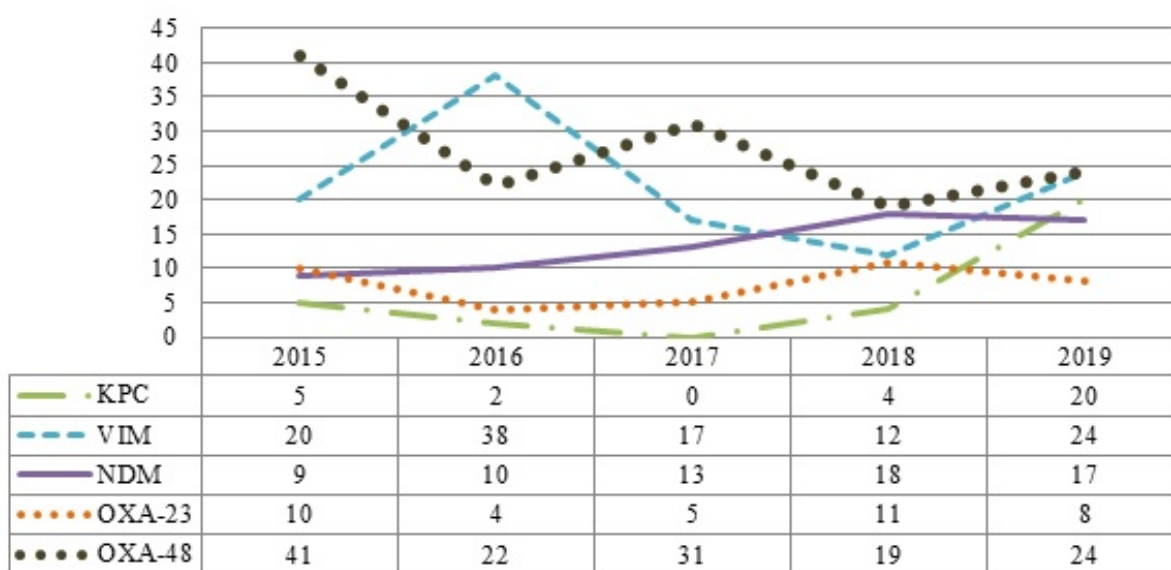

Figure A2: Relative (left) and absolute (right) quantities of the most clinically relevant species (above) and carbapenemases (below) detected among patients of different age groups.

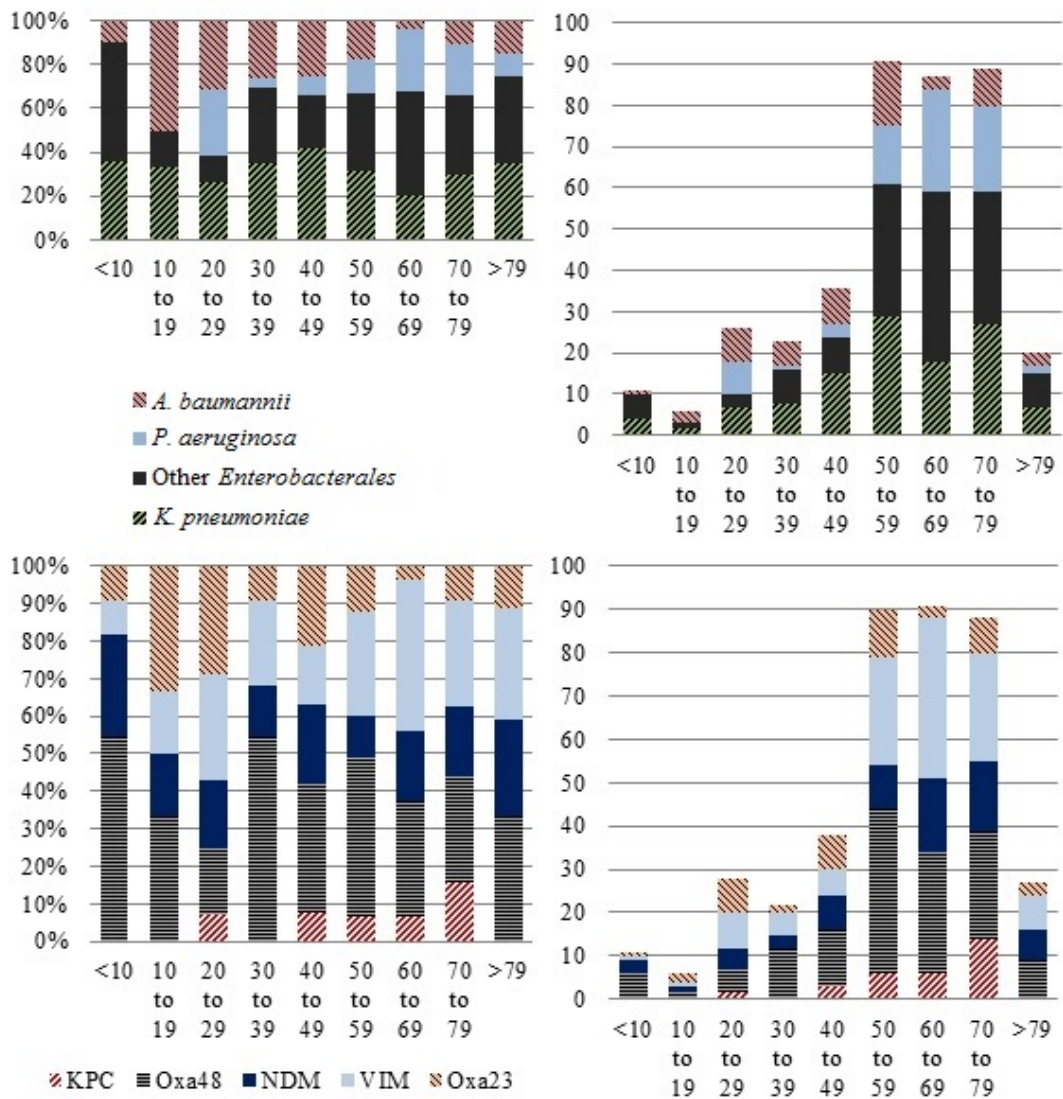

# Appendix B Full Tables of Regression Analysis

## B.1 Multivariate Linear Regressions

Table B1: Likelihood of colonization with carbapenemase-encoding Species for different Residency - linear regression analysis

|                          | A.baumannii<br>b/p-value/CI95          | Citrobact<br>b/p-value/CI95           | E.coli<br>b/p-value/CI95            | Enterobact<br>b/p-value/CI95          | K.pneumoniae<br>b/p-value/CI95      | Other Enterobact<br>b/p-value/CI95 | Other Nonfermenter<br>b/p-value/CI95  | P.aearuginosa<br>b/p-value/CI95     |
|--------------------------|----------------------------------------|---------------------------------------|-------------------------------------|---------------------------------------|-------------------------------------|------------------------------------|---------------------------------------|-------------------------------------|
| <b>Residency</b>         |                                        |                                       |                                     |                                       |                                     |                                    |                                       |                                     |
| Arabian Peninsula        | 0.136**<br>0.0289<br>[0.014,0.258]     | -0.027<br>0.5423<br>[-0.112,0.059]    | -0.014<br>0.8012<br>[-0.120,0.093]  | -0.122**<br>0.0354<br>[-0.236,-0.008] | 0.095<br>0.2464<br>[-0.066,0.255]   | -0.056<br>0.2548<br>[-0.152,0.040] | -0.026<br>0.2657<br>[-0.071,0.020]    | 0.013<br>0.8423<br>[-0.119,0.146]   |
| Other                    | -0.026<br>0.5759<br>[-0.118,0.066]     | 0.021<br>0.5306<br>[-0.044,0.085]     | -0.068*<br>0.0981<br>[-0.148,0.013] | -0.049<br>0.2665<br>[-0.134,0.037]    | 0.122**<br>0.0469<br>[0.002,0.243]  | 0.006<br>0.8671<br>[-0.066,0.078]  | -0.028<br>0.1044<br>[-0.062,0.006]    | 0.022<br>0.6714<br>[-0.078,0.121]   |
| <b>Control variables</b> |                                        |                                       |                                     |                                       |                                     |                                    |                                       |                                     |
| Age                      | -0.000<br>0.9613<br>[-0.008,0.007]     | -0.000<br>0.8793<br>[-0.006,0.005]    | 0.000<br>0.8916<br>[-0.006,0.007]   | 0.002<br>0.6454<br>[-0.005,0.009]     | 0.001<br>0.7751<br>[-0.009,0.011]   | -0.005<br>0.1325<br>[-0.011,0.001] | -0.003**<br>0.0290<br>[-0.006,-0.000] | 0.005<br>0.2572<br>[-0.003,0.013]   |
| Age × Age                | -0.000<br>0.4668<br>[-0.000,0.000]     | 0.000<br>0.7497<br>[-0.000,0.000]     | 0.000<br>0.8934<br>[-0.000,0.000]   | -0.000<br>0.7263<br>[-0.000,0.000]    | -0.000<br>0.6860<br>[-0.000,0.000]  | 0.000<br>0.1732<br>[-0.000,0.000]  | 0.000***<br>0.0097<br>[0.000,0.000]   | -0.000<br>0.4641<br>[-0.000,0.000]  |
| Female                   | -0.024<br>0.5336<br>[-0.100,0.052]     | -0.053**<br>0.0495<br>[-0.106,-0.000] | 0.056*<br>0.0972<br>[-0.010,0.122]  | 0.020<br>0.5832<br>[-0.051,0.091]     | 0.067<br>0.1882<br>[-0.033,0.166]   | 0.002<br>0.9417<br>[-0.057,0.062]  | -0.009<br>0.5216<br>[-0.037,0.019]    | -0.058<br>0.1641<br>[-0.141,0.024]  |
| Oncological:yes          | -0.148***<br>0.0031<br>[-0.245,-0.050] | 0.033<br>0.3410<br>[-0.035,0.102]     | 0.013<br>0.7600<br>[-0.072,0.098]   | -0.016<br>0.7346<br>[-0.107,0.075]    | -0.116*<br>0.0749<br>[-0.245,0.012] | -0.014<br>0.7227<br>[-0.091,0.063] | 0.071***<br>0.0001<br>[0.035,0.108]   | 0.176***<br>0.0012<br>[0.070,0.282] |
| History of ICU:yes       | 0.026<br>0.7079<br>[-0.111,0.163]      | 0.083*<br>0.0917<br>[-0.013,0.179]    | 0.015<br>0.8096<br>[-0.105,0.135]   | 0.011<br>0.8657<br>[-0.117,0.139]     | -0.061<br>0.5064<br>[-0.242,0.119]  | -0.041<br>0.4541<br>[-0.149,0.067] | -0.046*<br>0.0791<br>[-0.097,0.005]   | 0.013<br>0.8603<br>[-0.136,0.162]   |
| ICU:yes                  | -0.119*<br>0.0903<br>[-0.256,0.019]    | -0.058<br>0.2413<br>[-0.154,0.039]    | -0.017<br>0.7853<br>[-0.137,0.103]  | 0.072<br>0.2707<br>[-0.056,0.201]     | 0.046<br>0.6159<br>[-0.135,0.227]   | 0.082<br>0.1370<br>[-0.026,0.190]  | 0.013<br>0.6081<br>[-0.038,0.065]     | -0.021<br>0.7839<br>[-0.170,0.128]  |
| Days hospitalised        | -0.001<br>0.1017<br>[-0.001,0.000]     | -0.000<br>0.3897<br>[-0.001,0.000]    | -0.000<br>0.2087<br>[-0.001,0.000]  | -0.000<br>0.6145<br>[-0.001,0.000]    | -0.000<br>0.3989<br>[-0.001,0.001]  | 0.001**<br>0.0138<br>[0.000,0.001] | 0.000<br>0.8415<br>[-0.000,0.000]     | 0.001***<br>0.0078<br>[0.000,0.002] |
| Constant                 | 0.332***<br>0.0018<br>[0.124,0.539]    | 0.055<br>0.4603<br>[-0.091,0.200]     | 0.071<br>0.4417<br>[-0.110,0.252]   | 0.072<br>0.4687<br>[-0.122,0.265]     | 0.266*<br>0.0556<br>[-0.006,0.539]  | 0.166**<br>0.0462<br>[0.003,0.329] | 0.077**<br>0.0495<br>[0.000,0.155]    | -0.039<br>0.7354<br>[-0.264,0.187]  |
| Observations             | 390                                    | 390                                   | 390                                 | 390                                   | 390                                 | 390                                | 390                                   | 390                                 |
| R <sup>2</sup>           | 0.096                                  | 0.022                                 | 0.026                               | 0.036                                 | 0.045                               | 0.029                              | 0.095                                 | 0.080                               |

Notes: Values of b show the estimated coefficients of linear probability models on the likelihood that the respective Species were detected, together with their p-value and confidence interval (95%). Baseline category for Residency is Germany. Statistical significance level \*  $p < 0.10$ , \*\*  $p < 0.05$ , \*\*\*  $p < 0.01$ .

Table B2: Likelihood of colonization with carbapenemase-encoding Species for different Ethnicity - linear regression analysis

|                    | A.baumannii<br>b/p-value/CI95          | Citrobact<br>b/p-value/CI95           | E.coli<br>b/p-value/CI95           | Enterobact<br>b/p-value/CI95           | K.pneumoniae<br>b/p-value/CI95        | Other Enterobact<br>b/p-value/CI95  | Other Nonfermenter<br>b/p-value/CI95  | P.aearuginosa<br>b/p-value/CI95     |
|--------------------|----------------------------------------|---------------------------------------|------------------------------------|----------------------------------------|---------------------------------------|-------------------------------------|---------------------------------------|-------------------------------------|
| Ethnicity          |                                        |                                       |                                    |                                        |                                       |                                     |                                       |                                     |
| Arabic             | 0.155**<br>0.0104<br>[0.037,0.274]     | -0.041<br>0.3285<br>[-0.124,0.042]    | -0.002<br>0.9706<br>[-0.106,0.102] | -0.162***<br>0.0040<br>[-0.272,-0.052] | 0.105<br>0.1851<br>[-0.050,0.260]     | -0.027<br>0.5689<br>[-0.120,0.066]  | -0.023<br>0.3155<br>[-0.067,0.022]    | -0.005<br>0.9393<br>[-0.134,0.124]  |
| Kashmiri           | -0.017<br>0.8962<br>[-0.278,0.243]     | -0.073<br>0.4332<br>[-0.255,0.110]    | -0.091<br>0.4354<br>[-0.319,0.138] | 0.004<br>0.9764<br>[-0.238,0.246]      | 0.283<br>0.1033<br>[-0.058,0.624]     | 0.091<br>0.3823<br>[-0.114,0.296]   | -0.008<br>0.8755<br>[-0.105,0.090]    | -0.189<br>0.1878<br>[-0.472,0.093]  |
| Punjabi            | 0.140<br>0.1313<br>[-0.042,0.322]      | -0.078<br>0.2276<br>[-0.206,0.049]    | -0.059<br>0.4666<br>[-0.218,0.100] | -0.131<br>0.1269<br>[-0.300,0.037]     | 0.292**<br>0.0163<br>[0.054,0.530]    | -0.072<br>0.3196<br>[-0.215,0.070]  | -0.021<br>0.5400<br>[-0.089,0.047]    | -0.070<br>0.4881<br>[-0.267,0.127]  |
| Somalian           | 0.103<br>0.2497<br>[-0.072,0.277]      | -0.076<br>0.2257<br>[-0.198,0.047]    | 0.152*<br>0.0518<br>[-0.001,0.305] | -0.118<br>0.1549<br>[-0.280,0.045]     | 0.101<br>0.3855<br>[-0.128,0.330]     | 0.063<br>0.3662<br>[-0.074,0.201]   | -0.050<br>0.1314<br>[-0.116,0.015]    | -0.175*<br>0.0698<br>[-0.365,0.014] |
| Turkish            | 0.132<br>0.1106<br>[-0.030,0.294]      | -0.086<br>0.1367<br>[-0.200,0.027]    | -0.031<br>0.6705<br>[-0.173,0.111] | -0.137*<br>0.0738<br>[-0.288,0.013]    | 0.176<br>0.1038<br>[-0.036,0.388]     | 0.054<br>0.4046<br>[-0.073,0.181]   | -0.024<br>0.4416<br>[-0.085,0.037]    | -0.084<br>0.3475<br>[-0.259,0.092]  |
| Other              | 0.025<br>0.6489<br>[-0.083,0.133]      | 0.030<br>0.4452<br>[-0.046,0.105]     | 0.005<br>0.9169<br>[-0.090,0.100]  | 0.034<br>0.5064<br>[-0.067,0.135]      | -0.050<br>0.4887<br>[-0.192,0.092]    | 0.078*<br>0.0727<br>[-0.007,0.163]  | -0.025<br>0.2306<br>[-0.065,0.016]    | -0.097<br>0.1058<br>[-0.214,0.021]  |
| Control variables  |                                        |                                       |                                    |                                        |                                       |                                     |                                       |                                     |
| Age                | -0.000<br>0.9403<br>[-0.008,0.007]     | -0.001<br>0.8084<br>[-0.006,0.005]    | 0.001<br>0.7950<br>[-0.006,0.007]  | 0.001<br>0.6874<br>[-0.006,0.008]      | 0.002<br>0.7094<br>[-0.008,0.012]     | -0.004<br>0.1622<br>[-0.010,0.002]  | -0.003**<br>0.0260<br>[-0.006,-0.000] | 0.004<br>0.3138<br>[-0.004,0.012]   |
| Age × Age          | -0.000<br>0.5484<br>[-0.000,0.000]     | 0.000<br>0.7621<br>[-0.000,0.000]     | 0.000<br>0.9394<br>[-0.000,0.000]  | -0.000<br>0.7318<br>[-0.000,0.000]     | -0.000<br>0.6741<br>[-0.000,0.000]    | 0.000<br>0.1666<br>[-0.000,0.000]   | 0.000**<br>0.0102<br>[0.000,0.000]    | -0.000<br>0.4251<br>[-0.000,0.000]  |
| Female             | -0.016<br>0.6821<br>[-0.092,0.061]     | -0.062**<br>0.0246<br>[-0.115,-0.008] | 0.056<br>0.1034<br>[-0.011,0.123]  | 0.014<br>0.7056<br>[-0.057,0.085]      | 0.080<br>0.1166<br>[-0.020,0.180]     | 0.080<br>0.9674<br>[-0.061,0.059]   | -0.001<br>0.5671<br>[-0.037,0.020]    | -0.062<br>0.1399<br>[-0.145,0.021]  |
| Oncological:yes    | -0.133***<br>0.0060<br>[-0.227,-0.038] | 0.023<br>0.4965<br>[-0.043,0.089]     | 0.021<br>0.6187<br>[-0.062,0.104]  | -0.008<br>0.8666<br>[-0.095,0.080]     | -0.132**<br>0.0374<br>[-0.255,-0.008] | -0.019<br>0.6088<br>[-0.094,0.055]  | 0.080***<br>0.0000<br>[0.044,0.115]   | 0.168***<br>0.0014<br>[0.065,0.270] |
| History of ICU:yes | 0.054<br>0.4199<br>[-0.078,0.186]      | 0.066<br>0.1635<br>[-0.027,0.158]     | 0.044<br>0.4497<br>[-0.071,0.160]  | 0.013<br>0.8311<br>[-0.109,0.136]      | -0.091<br>0.3001<br>[-0.264,0.082]    | -0.048<br>0.3646<br>[-0.152,0.056]  | -0.037<br>0.1464<br>[-0.086,0.013]    | -0.002<br>0.9783<br>[-0.145,0.141]  |
| ICU:yes            | -0.122*<br>0.0818<br>[-0.260,0.016]    | -0.058<br>0.2382<br>[-0.155,0.039]    | -0.015<br>0.8117<br>[-0.136,0.106] | 0.077<br>0.2384<br>[-0.051,0.205]      | 0.052<br>0.5755<br>[-0.129,0.232]     | 0.092*<br>0.0945<br>[-0.016,0.201]  | 0.010<br>0.7109<br>[-0.042,0.061]     | -0.035<br>0.6417<br>[-0.185,0.114]  |
| Days hospitalised  | -0.001<br>0.1405<br>[-0.001,0.000]     | -0.000<br>0.3590<br>[-0.001,0.000]    | -0.000<br>0.2085<br>[-0.001,0.000] | -0.000<br>0.4794<br>[-0.001,0.000]     | -0.000<br>0.4441<br>[-0.001,0.001]    | 0.001***<br>0.0091<br>[0.000,0.001] | 0.000<br>0.9681<br>[-0.000,0.000]     | 0.001***<br>0.0098<br>[0.000,0.002] |
| Constant           | 0.274***<br>0.0089<br>[0.069,0.479]    | 0.097<br>0.1842<br>[-0.046,0.241]     | 0.020<br>0.8254<br>[-0.159,0.200]  | 0.088<br>0.3638<br>[-0.102,0.278]      | 0.260*<br>0.0577<br>[-0.009,0.528]    | 0.128<br>0.1192<br>[-0.033,0.289]   | 0.077**<br>0.0489<br>[0.000,0.154]    | 0.055<br>0.6245<br>[-0.167,0.278]   |
| Observations       | 390                                    | 390                                   | 390                                | 390                                    | 390                                   | 390                                 | 390                                   | 390                                 |
| R <sup>2</sup>     | 0.105                                  | 0.037                                 | 0.033                              | 0.061                                  | 0.066                                 | 0.044                               | 0.097                                 | 0.097                               |

Notes: Values of b show the estimated coefficients of linear probability models on the likelihood that the respective Species were detected, together with their p-value and confidence interval (95%). Baseline category for Ethnicity is German. Statistical significance level \*  $p < 0.10$ , \*\*  $p < 0.05$ , \*\*\*  $p < 0.01$ .

Table B3: Likelihood of Carbapenemases for different Residency - linear regression analysis

|                          | GES            | KPC             | NDM            | OXA-23          | OXA-24-72      | OXA-48          | OXA-58         | OXA-72         | VIM             |
|--------------------------|----------------|-----------------|----------------|-----------------|----------------|-----------------|----------------|----------------|-----------------|
|                          | b/p-value/CI95 | b/p-value/CI95  | b/p-value/CI95 | b/p-value/CI95  | b/p-value/CI95 | b/p-value/CI95  | b/p-value/CI95 | b/p-value/CI95 | b/p-value/CI95  |
| <b>Residency</b>         |                |                 |                |                 |                |                 |                |                |                 |
| Arabian Peninsula        | 0.047**        | -0.072          | -0.013         | 0.159***        | -0.021         | 0.069           | 0.000          | -0.017         | -0.165**        |
|                          | 0.0498         | 0.1252          | 0.8445         | 0.0053          | 0.2379         | 0.4186          | 0.9830         | 0.3516         | 0.0352          |
|                          | [0.000,0.094]  | [-0.165,0.020]  | [-0.148,0.121] | [0.048,0.271]   | [-0.057,0.014] | [-0.098,0.236]  | [-0.018,0.018] | [-0.053,0.019] | [-0.319,-0.012] |
| Other                    | -0.011         | 0.008           | 0.005          | -0.021          | 0.013          | 0.069           | 0.009          | -0.003         | -0.094          |
|                          | 0.5437         | 0.8135          | 0.9295         | 0.6253          | 0.3517         | 0.2817          | 0.2178         | 0.8122         | 0.1114          |
|                          | [-0.046,0.024] | [-0.061,0.078]  | [-0.097,0.106] | [-0.105,0.063]  | [-0.014,0.039] | [-0.057,0.195]  | [-0.005,0.022] | [-0.030,0.024] | [-0.210,0.022]  |
| <b>Control variables</b> |                |                 |                |                 |                |                 |                |                |                 |
| Age                      | 0.001          | 0.000           | -0.004         | -0.001          | -0.000         | 0.001           | 0.000          | 0.001          | 0.003           |
|                          | 0.3234         | 0.9223          | 0.3422         | 0.7710          | 0.9484         | 0.9153          | 0.5152         | 0.4952         | 0.5793          |
|                          | [-0.001,0.004] | [-0.005,0.006]  | [-0.012,0.004] | [-0.008,0.006]  | [-0.002,0.002] | [-0.010,0.011]  | [-0.001,0.002] | [-0.001,0.003] | [-0.007,0.012]  |
| Age × Age                | -0.000         | 0.000           | 0.000          | -0.000          | -0.000         | -0.000          | -0.000         | -0.000         | -0.000          |
|                          | 0.6617         | 0.8855          | 0.2544         | 0.8578          | 0.5151         | 0.7452          | 0.4806         | 0.2827         | 0.8806          |
|                          | [-0.000,0.000] | [-0.000,0.000]  | [-0.000,0.000] | [-0.000,0.000]  | [-0.000,0.000] | [-0.000,0.000]  | [-0.000,0.000] | [-0.000,0.000] | [-0.000,0.000]  |
| Female                   | 0.010          | -0.005          | 0.075*         | -0.048          | 0.013          | 0.090*          | -0.002         | 0.001          | -0.120**        |
|                          | 0.4826         | 0.8638          | 0.0780         | 0.1768          | 0.2490         | 0.0906          | 0.6910         | 0.9598         | 0.0143          |
|                          | [-0.019,0.040] | [-0.063,0.053]  | [-0.008,0.159] | [-0.117,0.022]  | [-0.009,0.035] | [-0.014,0.194]  | [-0.014,0.009] | [-0.022,0.023] | [-0.215,-0.024] |
| Oncological:yes          | 0.014          | -0.076**        | 0.140**        | -0.109**        | -0.012         | -0.137**        | -0.000         | -0.013         | 0.269***        |
|                          | 0.4583         | 0.0440          | 0.0114         | 0.0174          | 0.4263         | 0.0446          | 0.9516         | 0.3731         | 0.0000          |
|                          | [-0.023,0.052] | [-0.150,-0.002] | [0.032,0.247]  | [-0.198,-0.019] | [-0.040,0.017] | [-0.271,-0.003] | [-0.015,0.014] | [-0.042,0.016] | [0.146,0.391]   |
| History of ICU:yes       | -0.023         | 0.203***        | 0.016          | -0.008          | -0.005         | -0.231**        | 0.000          | -0.013         | 0.012           |
|                          | 0.3927         | 0.0002          | 0.8378         | 0.8983          | 0.7992         | 0.0163          | 0.9774         | 0.5361         | 0.8913          |
|                          | [-0.076,0.030] | [0.098,0.307]   | [-0.136,0.168] | [-0.134,0.118]  | [-0.045,0.035] | [-0.420,-0.043] | [-0.020,0.021] | [-0.053,0.028] | [-0.161,0.185]  |
| ICU:yes                  | 0.004          | -0.091*         | -0.037         | -0.038          | -0.008         | 0.115           | -0.001         | -0.005         | 0.083           |
|                          | 0.8966         | 0.0885          | 0.6317         | 0.5587          | 0.6855         | 0.2314          | 0.9304         | 0.8144         | 0.3483          |
|                          | [-0.050,0.057] | [-0.195,0.014]  | [-0.189,0.115] | [-0.164,0.089]  | [-0.048,0.032] | [-0.074,0.304]  | [-0.021,0.020] | [-0.045,0.036] | [-0.091,0.256]  |
| Days hospitalised        | -0.000         | -0.000          | -0.000         | -0.000          | -0.000         | 0.001*          | -0.000         | -0.000         | 0.000           |
|                          | 0.2104         | 0.9500          | 0.3338         | 0.2232          | 0.7965         | 0.0662          | 0.8445         | 0.5712         | 0.5725          |
|                          | [-0.000,0.000] | [-0.001,0.001]  | [-0.001,0.000] | [-0.001,0.000]  | [-0.000,0.000] | [-0.000,0.002]  | [-0.000,0.000] | [-0.000,0.000] | [-0.001,0.001]  |
| Constant                 | -0.037         | 0.019           | 0.205*         | 0.250**         | 0.043          | 0.375**         | -0.005         | 0.023          | 0.155           |
|                          | 0.3657         | 0.8144          | 0.0792         | 0.0101          | 0.1627         | 0.0100          | 0.7340         | 0.4615         | 0.2461          |
|                          | [-0.117,0.043] | [-0.139,0.177]  | [-0.024,0.435] | [0.060,0.440]   | [-0.017,0.104] | [0.090,0.659]   | [-0.036,0.025] | [-0.038,0.084] | [-0.107,0.416]  |
| Observations             | 390            | 390             | 390            | 390             | 390            | 390             | 390            | 390            | 390             |
| R <sup>2</sup>           | 0.031          | 0.092           | 0.035          | 0.072           | 0.038          | 0.052           | 0.009          | 0.019          | 0.113           |

Notes: Values of b show the estimated coefficients of linear probability models on the likelihood that the respective carbapenemases were detected, together with their p-value and confidence interval (95%). Baseline category for Residency is Germany. Statistical significance level \*  $p < 0.10$ , \*\*  $p < 0.05$ , \*\*\*  $p < 0.01$ .

Table B4: Likelihood of Carbapenemases for different Ethnicity - linear regression analysis

|                          | GES            | KPC             | NDM            | OXA-23          | OXA-24-72      | OXA-48          | OXA-58         | OXA-72         | VIM             |
|--------------------------|----------------|-----------------|----------------|-----------------|----------------|-----------------|----------------|----------------|-----------------|
|                          | b/p-value/CI95 | b/p-value/CI95  | b/p-value/CI95 | b/p-value/CI95  | b/p-value/CI95 | b/p-value/CI95  | b/p-value/CI95 | b/p-value/CI95 | b/p-value/CI95  |
| <b>Ethnicity</b>         |                |                 |                |                 |                |                 |                |                |                 |
| Arabic                   | 0.009          | -0.089*         | 0.057          | 0.160***        | -0.015         | 0.032           | -0.005         | 0.022          | -0.180**        |
|                          | 0.7025         | 0.0543          | 0.3913         | 0.0038          | 0.3792         | 0.6973          | 0.5447         | 0.2016         | 0.0178          |
|                          | [-0.037,0.055] | [-0.179,0.002]  | [-0.074,0.187] | [0.052,0.268]   | [-0.050,0.019] | [-0.131,0.195]  | [-0.023,0.012] | [-0.012,0.057] | [-0.330,-0.031] |
| Kashmiri                 | -0.018         | -0.104          | 0.035          | 0.030           | -0.016         | 0.037           | -0.007         | -0.009         | 0.006           |
|                          | 0.7347         | 0.3017          | 0.8128         | 0.8058          | 0.6715         | 0.8391          | 0.7091         | 0.8131         | 0.9734          |
|                          | [-0.119,0.084] | [-0.303,0.094]  | [-0.252,0.321] | [-0.208,0.267]  | [-0.092,0.060] | [-0.321,0.395]  | [-0.046,0.032] | [-0.085,0.067] | [-0.322,0.333]  |
| Punjabi                  | -0.010         | -0.070          | 0.105          | 0.117           | 0.044          | 0.028           | -0.009         | -0.009         | -0.116          |
|                          | 0.7853         | 0.3223          | 0.3041         | 0.1645          | 0.1056         | 0.8271          | 0.5327         | 0.7374         | 0.3192          |
|                          | [-0.081,0.061] | [-0.209,0.069]  | [-0.095,0.305] | [-0.048,0.283]  | [-0.009,0.097] | [-0.222,0.278]  | [-0.036,0.019] | [-0.062,0.044] | [-0.344,0.113]  |
| Somalian                 | -0.023         | -0.039          | 0.257***       | 0.021           | 0.043*         | 0.088           | -0.007         | -0.006         | -0.232**        |
|                          | 0.5105         | 0.5652          | 0.0091         | 0.7995          | 0.0964         | 0.4703          | 0.6115         | 0.8203         | 0.0389          |
|                          | [-0.091,0.045] | [-0.172,0.094]  | [0.064,0.449]  | [-0.139,0.180]  | [-0.008,0.094] | [-0.152,0.329]  | [-0.033,0.019] | [-0.057,0.045] | [-0.451,-0.012] |
| Turkish                  | -0.019         | -0.027          | -0.011         | 0.224***        | -0.016         | 0.083           | -0.008         | -0.009         | -0.267**        |
|                          | 0.5517         | 0.6652          | 0.9068         | 0.0030          | 0.5074         | 0.4614          | 0.5079         | 0.6941         | 0.0103          |
|                          | [-0.082,0.044] | [-0.151,0.096]  | [-0.189,0.168] | [0.076,0.372]   | [-0.063,0.031] | [-0.139,0.306]  | [-0.032,0.016] | [-0.057,0.038] | [-0.470,-0.063] |
| Other                    | 0.002          | 0.014           | 0.104*         | -0.040          | 0.005          | -0.133*         | -0.006         | 0.056***       | -0.063          |
|                          | 0.9182         | 0.7345          | 0.0860         | 0.4282          | 0.7540         | 0.0807          | 0.4621         | 0.0005         | 0.3605          |
|                          | [-0.040,0.045] | [-0.068,0.097]  | [-0.015,0.224] | [-0.139,0.059]  | [-0.027,0.037] | [-0.281,0.016]  | [-0.022,0.010] | [0.024,0.087]  | [-0.200,0.073]  |
| <b>Control variables</b> |                |                 |                |                 |                |                 |                |                |                 |
| Age                      | 0.001          | 0.001           | -0.003         | -0.002          | 0.000          | 0.000           | 0.000          | 0.001          | 0.002           |
|                          | 0.5553         | 0.8537          | 0.5216         | 0.6336          | 0.7338         | 0.9389          | 0.5710         | 0.3629         | 0.6059          |
|                          | [-0.002,0.004] | [-0.005,0.006]  | [-0.011,0.006] | [-0.009,0.005]  | [-0.002,0.003] | [-0.010,0.011]  | [-0.001,0.001] | [-0.001,0.003] | [-0.007,0.012]  |
| Age × Age                | -0.000         | 0.000           | 0.000          | 0.000           | -0.000         | -0.000          | -0.000         | -0.000         | -0.000          |
|                          | 0.8339         | 0.9800          | 0.2904         | 0.9796          | 0.3593         | 0.6980          | 0.4452         | 0.2883         | 0.8452          |
|                          | [-0.000,0.000] | [-0.000,0.000]  | [-0.000,0.000] | [-0.000,0.000]  | [-0.000,0.000] | [-0.000,0.000]  | [-0.000,0.000] | [-0.000,0.000] | [-0.000,0.000]  |
| Female                   | 0.010          | -0.007          | 0.074*         | -0.035          | 0.014          | 0.096*          | -0.003         | -0.003         | -0.125**        |
|                          | 0.5306         | 0.8082          | 0.0866         | 0.3298          | 0.2180         | 0.0736          | 0.6046         | 0.7730         | 0.0109          |
|                          | [-0.020,0.039] | [-0.066,0.051]  | [-0.011,0.158] | [-0.104,0.035]  | [-0.008,0.036] | [-0.009,0.201]  | [-0.014,0.008] | [-0.026,0.019] | [-0.221,-0.029] |
| Oncological:yes          | 0.018          | -0.085**        | 0.133**        | -0.090**        | -0.016         | -0.157**        | -0.003         | -0.013         | 0.292***        |
|                          | 0.3406         | 0.0214          | 0.0122         | 0.0405          | 0.2518         | 0.0181          | 0.6320         | 0.3720         | 0.0000          |
|                          | [-0.019,0.055] | [-0.157,-0.013] | [0.029,0.237]  | [-0.176,-0.004] | [-0.044,0.011] | [-0.287,-0.027] | [-0.018,0.011] | [-0.040,0.015] | [0.174,0.411]   |
| History of ICU:yes       | -0.020         | 0.192***        | 0.028          | 0.016           | -0.008         | -0.255***       | -0.004         | -0.011         | 0.032           |
|                          | 0.4398         | 0.0002          | 0.7093         | 0.7998          | 0.6980         | 0.0060          | 0.6730         | 0.5765         | 0.7050          |
|                          | [-0.072,0.031] | [0.091,0.292]   | [-0.118,0.173] | [-0.105,0.136]  | [-0.046,0.031] | [-0.436,-0.073] | [-0.024,0.015] | [-0.049,0.027] | [-0.134,0.198]  |
| ICU:yes                  | 0.004          | -0.088          | -0.031         | -0.042          | -0.007         | 0.119           | -0.001         | -0.007         | 0.072           |
|                          | 0.8818         | 0.1011          | 0.6858         | 0.5080          | 0.7214         | 0.2192          | 0.9451         | 0.7316         | 0.4119          |
|                          | [-0.050,0.058] | [-0.193,0.017]  | [-0.183,0.121] | [-0.168,0.083]  | [-0.048,0.033] | [-0.071,0.308]  | [-0.021,0.020] | [-0.047,0.033] | [-0.101,0.246]  |
| Days hospitalised        | -0.000         | -0.000          | -0.000         | -0.000          | -0.000         | 0.001*          | -0.000         | -0.000         | 0.000           |
|                          | 0.2092         | 0.9199          | 0.3455         | 0.3331          | 0.6905         | 0.0589          | 0.8282         | 0.6377         | 0.8228          |
|                          | [-0.000,0.000] | [-0.001,0.001]  | [-0.001,0.000] | [-0.001,0.000]  | [-0.000,0.000] | [-0.000,0.002]  | [-0.000,0.000] | [-0.000,0.000] | [-0.001,0.001]  |
| Constant                 | -0.013         | 0.033           | 0.102          | 0.224**         | 0.029          | 0.434***        | 0.006          | -0.002         | 0.186           |
|                          | 0.7467         | 0.6789          | 0.3761         | 0.0187          | 0.3408         | 0.0026          | 0.6971         | 0.9403         | 0.1575          |
|                          | [-0.093,0.067] | [-0.123,0.189]  | [-0.124,0.327] | [0.038,0.411]   | [-0.031,0.089] | [0.152,0.715]   | [-0.025,0.037] | [-0.062,0.057] | [-0.072,0.443]  |
| Observations             | 390            | 390             | 390            | 390             | 390            | 390             | 390            | 390            | 390             |
| R <sup>2</sup>           | 0.021          | 0.100           | 0.059          | 0.096           | 0.050          | 0.061           | 0.008          | 0.055          | 0.130           |

Notes: Values of b show the estimated coefficients of linear probability models on the likelihood that the respective carbapenemases were detected, together with their p-value and confidence interval (95%). Baseline category for Ethnicity is German. Statistical significance level \*  $p < 0.10$ , \*\*  $p < 0.05$ , \*\*\*  $p < 0.01$ .

Table B5: Likelihood of colonization with carbapenemase-encoding Species for different Ethnicity among German residents - linear regression analysis

|                    | A.baumannii<br>b/p-value/CI95              | Citrobact<br>b/p-value/CI95                  | E.coli<br>b/p-value/CI95                     | Enterobact<br>b/p-value/CI95                | K.pneumoniae<br>b/p-value/CI95              | Other Enterobact<br>b/p-value/CI95           | Other Nonfermenter<br>b/p-value/CI95         | P.aearuginosa<br>b/p-value/CI95               |
|--------------------|--------------------------------------------|----------------------------------------------|----------------------------------------------|---------------------------------------------|---------------------------------------------|----------------------------------------------|----------------------------------------------|-----------------------------------------------|
| Ethnicity          |                                            |                                              |                                              |                                             |                                             |                                              |                                              |                                               |
| Arabic             | 0.087<br>0.4216<br>[-0.125,0.299]          | -0.027<br>0.7537<br>[-0.195,0.141]           | 0.200*<br>0.0823<br>[-0.026,0.426]           | -0.158<br>0.2005<br>[-0.401,0.085]          | 0.059<br>0.6900<br>[-0.232,0.349]           | -0.054<br>0.5790<br>[-0.245,0.137]           | -0.037<br>0.5118<br>[-0.147,0.073]           | -0.070<br>0.5968<br>[-0.330,0.190]            |
| Kashmiri           | -0.169<br>0.4593<br>[-0.617,0.280]         | 0.016<br>0.9294<br>[-0.340,0.372]            | -0.137<br>0.5724<br>[-0.615,0.341]           | 0.405<br>0.1211<br>[-0.108,0.919]           | 0.216<br>0.4888<br>[-0.398,0.831]           | -0.104<br>0.6137<br>[-0.509,0.301]           | 0.040<br>0.7363<br>[-0.193,0.273]            | -0.268<br>0.3398<br>[-0.819,0.284]            |
| Punjabi            | 0.3045<br>0.4044<br>[-0.125,0.308]         | 0.8428<br>0.6665<br>[-0.210,0.134]           | 0.7037<br>0.3149<br>[-0.113,0.349]           | 0.6906<br>0.4501<br>[-0.343,0.153]          | 0.6016<br>0.1848<br>[-0.096,0.497]          | 0.8821<br>0.4782<br>[-0.125,0.266]           | 0.7836<br>0.0927<br>[-0.209,0.016]           | 0.1916<br>0.0639<br>[-0.517,0.015]            |
| Somalian           | 0.092<br>0.6543<br>[-0.167,0.265]          | -0.038<br>0.6183<br>[-0.215,0.128]           | 0.118<br>0.3499<br>[-0.340,0.121]            | -0.095<br>0.2786<br>[-0.384,0.111]          | 0.200<br>0.3358<br>[-0.151,0.441]           | 0.071<br>0.0673<br>[-0.013,0.377]            | -0.096*<br>0.5932<br>[-0.143,0.082]          | -0.251*<br>0.6754<br>[-0.322,0.209]           |
| Turkish            | 0.049<br>0.003<br>0.9618<br>[-0.123,0.129] | -0.043<br>0.130**<br>0.0111<br>[0.030,0.230] | -0.109<br>-0.057<br>0.4017<br>[-0.191,0.077] | -0.136<br>0.058<br>0.4247<br>[-0.086,0.202] | 0.145<br>-0.092<br>0.2920<br>[-0.265,0.080] | 0.182*<br>0.116**<br>0.0463<br>[0.002,0.229] | -0.030<br>-0.020<br>0.5497<br>[-0.085,0.045] | -0.056<br>-0.137*<br>0.0811<br>[-0.292,0.017] |
| Control variables  |                                            |                                              |                                              |                                             |                                             |                                              |                                              |                                               |
| Age                | -0.004<br>0.4733<br>[-0.015,0.007]         | -0.000<br>0.9773<br>[-0.009,0.008]           | 0.006<br>0.2714<br>[-0.005,0.018]            | 0.002<br>0.7189<br>[-0.010,0.014]           | -0.000<br>0.9595<br>[-0.015,0.014]          | -0.003<br>0.5382<br>[-0.013,0.007]           | -0.007**<br>0.0154<br>[-0.012,-0.001]        | 0.006<br>0.3943<br>[-0.007,0.019]             |
| Age × Age          | 0.000<br>0.8431<br>[-0.000,0.000]          | 0.000<br>0.7694<br>[-0.000,0.000]            | -0.000<br>0.3767<br>[-0.000,0.000]           | 0.000<br>0.9578<br>[-0.000,0.000]           | -0.000<br>0.7712<br>[-0.000,0.000]          | 0.000<br>0.5352<br>[-0.000,0.000]            | 0.000***<br>0.0081<br>[0.000,0.000]          | -0.000<br>0.3725<br>[-0.000,0.000]            |
| Female             | 0.004<br>0.9255<br>[-0.082,0.090]          | -0.080**<br>0.0227<br>[-0.148,-0.011]        | 0.059<br>0.2088<br>[-0.033,0.151]            | 0.028<br>0.5732<br>[-0.070,0.127]           | 0.055<br>0.3594<br>[-0.063,0.173]           | -0.016<br>0.6848<br>[-0.094,0.062]           | -0.011<br>0.6419<br>[-0.055,0.034]           | -0.040<br>0.4597<br>[-0.146,0.066]            |
| Oncological:yes    | -0.119**<br>0.0198<br>[-0.220,-0.019]      | 0.053<br>0.1925<br>[-0.027,0.132]            | -0.015<br>0.7875<br>[-0.121,0.092]           | -0.036<br>0.5355<br>[-0.151,0.079]          | -0.113<br>0.1063<br>[-0.250,0.024]          | -0.031<br>0.5029<br>[-0.121,0.060]           | 0.092***<br>0.0006<br>[0.040,0.144]          | 0.169***<br>0.0072<br>[0.046,0.292]           |
| History of ICU:yes | 0.022<br>0.7420<br>[-0.110,0.155]          | 0.079<br>0.1400<br>[-0.026,0.184]            | 0.039<br>0.5910<br>[-0.103,0.180]            | 0.015<br>0.8431<br>[-0.136,0.167]           | -0.050<br>0.5878<br>[-0.232,0.132]          | -0.044<br>0.4728<br>[-0.164,0.076]           | -0.056<br>0.1113<br>[-0.125,0.013]           | -0.006<br>0.9468<br>[-0.168,0.157]            |
| ICU:yes            | -0.125*<br>0.0593<br>[-0.256,0.005]        | -0.056<br>0.2830<br>[-0.160,0.047]           | -0.018<br>0.7959<br>[-0.157,0.121]           | 0.088<br>0.2475<br>[-0.061,0.237]           | -0.005<br>0.9603<br>[-0.183,0.174]          | 0.092<br>0.1230<br>[-0.025,0.210]            | 0.008<br>0.8155<br>[-0.060,0.076]            | 0.016<br>0.8406<br>[-0.144,0.176]             |
| Days hospitalised  | -0.000<br>0.6492<br>[-0.001,0.001]         | -0.000<br>0.5267<br>[-0.001,0.000]           | -0.001<br>0.2225<br>[-0.001,0.000]           | -0.001**<br>0.0459<br>[-0.002,-0.000]       | -0.001<br>0.3139<br>[-0.002,0.001]          | 0.001**<br>0.0154<br>[0.000,0.002]           | 0.000<br>0.7660<br>[-0.000,0.000]            | 0.001***<br>0.0039<br>[0.000,0.002]           |
| Constant           | 0.373**<br>0.0130<br>[0.079,0.667]         | 0.018<br>0.8804<br>[-0.215,0.251]            | -0.081<br>0.6128<br>[-0.393,0.232]           | 0.004<br>0.9809<br>[-0.332,0.340]           | 0.393*<br>0.0552<br>[-0.009,0.796]          | 0.100<br>0.4564<br>[-0.165,0.366]            | 0.182**<br>0.0199<br>[0.029,0.334]           | 0.010<br>0.9561<br>[-0.351,0.371]             |
| Observations       | 243                                        | 243                                          | 243                                          | 243                                         | 243                                         | 243                                          | 243                                          | 243                                           |
| R <sup>2</sup>     | 0.083                                      | 0.072                                        | 0.049                                        | 0.081                                       | 0.064                                       | 0.064                                        | 0.126                                        | 0.124                                         |

Notes: Values of b show the estimated coefficients of linear probability models on the likelihood that the respective Species were detected, together with their p-value and confidence interval (95%). Baseline category for Ethnicity is German. Statistical significance level \*  $p < 0.10$ , \*\*  $p < 0.05$ , \*\*\*  $p < 0.01$ .

Table B6: Likelihood of Carbapenemases for different Ethnicity among German residents - linear regression analysis

|                          | GES                                | KPC                                 | NDM                                | OXA-23                             | OXA-24-72                          | OXA-48                              | OXA-58                           | OXA-72                              | VIM                                   |
|--------------------------|------------------------------------|-------------------------------------|------------------------------------|------------------------------------|------------------------------------|-------------------------------------|----------------------------------|-------------------------------------|---------------------------------------|
|                          | b/p-value/CI95                     | b/p-value/CI95                      | b/p-value/CI95                     | b/p-value/CI95                     | b/p-value/CI95                     | b/p-value/CI95                      | b/p-value/CI95                   | b/p-value/CI95                      | b/p-value/CI95                        |
| <b>Ethnicity</b>         |                                    |                                     |                                    |                                    |                                    |                                     |                                  |                                     |                                       |
| Arabic                   | -0.026<br>0.5638<br>[-0.115,0.063] | -0.069<br>0.5000<br>[-0.268,0.131]  | -0.180<br>0.1814<br>[-0.445,0.085] | 0.245**<br>0.0114<br>[0.056,0.434] | -0.014<br>0.5380<br>[-0.058,0.030] | 0.201<br>0.1977<br>[-0.106,0.507]   | 0.000<br>0.1977<br>[0.000,0.000] | -0.011<br>0.7219<br>[-0.072,0.050]  | -0.221<br>0.1687<br>[-0.536,0.094]    |
| Kashmiri                 | 0.006<br>0.9468<br>[-0.181,0.194]  | -0.175<br>0.4147<br>[-0.598,0.248]  | -0.124<br>0.6621<br>[-0.684,0.436] | -0.081<br>0.6918<br>[-0.480,0.319] | -0.023<br>0.6217<br>[-0.117,0.070] | -0.429<br>0.1935<br>[-1.078,0.219]  | 0.000<br>0.1935<br>[0.000,0.000] | -0.007<br>0.9146<br>[-0.136,0.122]  | 0.814**<br>0.0170<br>[0.147,1.481]    |
| Punjabi                  | -0.027<br>0.7731<br>[-0.212,0.158] | -0.029<br>0.8898<br>[-0.447,0.388]  | -0.174<br>0.5346<br>[-0.727,0.378] | -0.149<br>0.4587<br>[-0.543,0.246] | -0.023<br>0.6173<br>[-0.116,0.069] | 0.158<br>0.6270<br>[-0.482,0.798]   | 0.000<br>0.6270<br>[0.000,0.000] | -0.026<br>0.6905<br>[-0.153,0.101]  | 0.185<br>0.5802<br>[-0.473,0.843]     |
| Somalian                 | -0.031<br>0.5061<br>[-0.121,0.060] | -0.008<br>0.9390<br>[-0.212,0.196]  | 0.195<br>0.1558<br>[-0.075,0.466]  | 0.033<br>0.7341<br>[-0.160,0.226]  | -0.017<br>0.4481<br>[-0.063,0.028] | 0.344**<br>0.0313<br>[0.031,0.657]  | 0.000<br>0.0313<br>[0.000,0.000] | -0.013<br>0.6896<br>[-0.075,0.050]  | -0.274*<br>0.0946<br>[-0.596,0.048]   |
| Turkish                  | -0.028<br>0.5470<br>[-0.118,0.063] | -0.060<br>0.5633<br>[-0.264,0.144]  | 0.051<br>0.7080<br>[-0.218,0.321]  | 0.217**<br>0.0276<br>[0.024,0.409] | -0.017<br>0.4648<br>[-0.062,0.028] | 0.129<br>0.4154<br>[-0.183,0.442]   | 0.000<br>0.4154<br>[0.000,0.000] | -0.016<br>0.6134<br>[-0.078,0.046]  | -0.361**<br>0.0276<br>[-0.683,-0.040] |
| Other                    | -0.021<br>0.4263<br>[-0.074,0.031] | -0.003<br>0.9614<br>[-0.122,0.116]  | 0.077<br>0.3339<br>[-0.080,0.234]  | -0.055<br>0.3363<br>[-0.167,0.057] | -0.013<br>0.3331<br>[-0.039,0.013] | -0.068<br>0.4600<br>[-0.250,0.114]  | 0.000<br>0.4600<br>[0.000,0.000] | 0.062***<br>0.0009<br>[0.026,0.098] | -0.049<br>0.6091<br>[-0.236,0.138]    |
| <b>Control variables</b> |                                    |                                     |                                    |                                    |                                    |                                     |                                  |                                     |                                       |
| Age                      | 0.001<br>0.5460<br>[-0.003,0.006]  | 0.001<br>0.8246<br>[-0.009,0.011]   | -0.001<br>0.9011<br>[-0.014,0.012] | -0.002<br>0.6513<br>[-0.012,0.007] | -0.001<br>0.5956<br>[-0.003,0.002] | 0.007<br>0.3696<br>[-0.008,0.022]   | 0.000<br>0.3696<br>[0.000,0.000] | -0.001<br>0.6048<br>[-0.004,0.002]  | -0.001<br>0.8973<br>[-0.017,0.015]    |
| Age × Age                | -0.000<br>0.6167<br>[-0.000,0.000] | 0.000<br>0.9397<br>[-0.000,0.000]   | 0.000<br>0.8466<br>[-0.000,0.000]  | 0.000<br>0.8405<br>[-0.000,0.000]  | 0.000<br>0.9767<br>[-0.000,0.000]  | -0.000<br>0.2553<br>[-0.000,0.000]  | 0.000<br>0.2553<br>[0.000,0.000] | 0.000<br>0.8472<br>[-0.000,0.000]   | 0.000<br>0.7170<br>[-0.000,0.000]     |
| Female                   | -0.004<br>0.8248<br>[-0.040,0.032] | -0.013<br>0.7453<br>[-0.095,0.068]  | 0.005<br>0.9328<br>[-0.103,0.112]  | -0.031<br>0.4275<br>[-0.108,0.046] | 0.013<br>0.1498<br>[-0.005,0.031]  | 0.143**<br>0.0246<br>[0.018,0.268]  | 0.000<br>0.0246<br>[0.000,0.000] | 0.006<br>0.6593<br>[-0.019,0.030]   | -0.148**<br>0.0234<br>[-0.277,-0.020] |
| Oncological:yes          | 0.024<br>0.2653<br>[-0.018,0.066]  | -0.086*<br>0.0745<br>[-0.180,0.009] | 0.115*<br>0.0707<br>[-0.010,0.240] | -0.067<br>0.1414<br>[-0.156,0.022] | -0.009<br>0.3891<br>[-0.030,0.012] | -0.121<br>0.1012<br>[-0.266,0.024]  | 0.000<br>0.1012<br>[0.000,0.000] | -0.014<br>0.3485<br>[-0.043,0.015]  | 0.242***<br>0.0016<br>[0.093,0.391]   |
| History of ICU:yes       | -0.019<br>0.4935<br>[-0.075,0.036] | 0.227***<br>0.0004<br>[0.102,0.352] | -0.032<br>0.7035<br>[-0.198,0.134] | 0.009<br>0.8822<br>[-0.109,0.127]  | -0.009<br>0.5357<br>[-0.036,0.019] | -0.184*<br>0.0596<br>[-0.376,0.008] | 0.000<br>0.0596<br>[0.000,0.000] | -0.019<br>0.3328<br>[-0.057,0.019]  | -0.032<br>0.7468<br>[-0.229,0.165]    |
| ICU:yes                  | 0.005<br>0.8428<br>[-0.049,0.060]  | -0.080<br>0.2004<br>[-0.203,0.043]  | -0.058<br>0.4820<br>[-0.221,0.104] | -0.058<br>0.3233<br>[-0.174,0.058] | -0.004<br>0.7471<br>[-0.032,0.023] | 0.063<br>0.5112<br>[-0.125,0.251]   | 0.000<br>0.5112<br>[0.000,0.000] | -0.003<br>0.8741<br>[-0.040,0.034]  | 0.148<br>0.1342<br>[-0.046,0.341]     |
| Days hospitalised        | -0.000<br>0.3775<br>[-0.000,0.000] | 0.000<br>0.4740<br>[-0.001,0.000]   | 0.000<br>0.8716<br>[-0.001,0.001]  | -0.000<br>0.7356<br>[-0.001,0.001] | -0.000<br>0.8826<br>[-0.000,0.000] | 0.001<br>0.1985<br>[-0.000,0.002]   | 0.000<br>0.1985<br>[0.000,0.000] | -0.000<br>0.8359<br>[-0.000,0.000]  | -0.000<br>0.7745<br>[-0.001,0.001]    |
| Constant                 | -0.009<br>0.8831<br>[-0.132,0.114] | -0.024<br>0.8618<br>[-0.301,0.252]  | 0.186<br>0.3190<br>[-0.181,0.552]  | 0.222*<br>0.0965<br>[-0.040,0.483] | 0.048<br>0.1260<br>[-0.014,0.109]  | 0.211<br>0.3288<br>[-0.214,0.635]   | 0.000<br>0.3288<br>[0.000,0.000] | 0.054<br>0.2106<br>[-0.031,0.138]   | 0.306<br>0.1691<br>[-0.131,0.742]     |
| Observations             | 243                                | 243                                 | 243                                | 243                                | 243                                | 243                                 | 243                              | 243                                 | 243                                   |
| R <sup>2</sup>           | 0.022                              | 0.127                               | 0.064                              | 0.088                              | 0.039                              | 0.099                               | .                                | 0.084                               | 0.134                                 |

Notes: Values of b show the estimated coefficients of linear probability models on the likelihood that the respective Species were detected, together with their p-value and confidence interval (95%). Baseline category for Ethnicity is German. Statistical significance level \*  $p < 0.10$ , \*\*  $p < 0.05$ , \*\*\*  $p < 0.01$ .



Table B7: Likelihood of colonization with carbapenemase-encoding Species for different Residency among patients of Arabic Ethnicity - linear regression analysis

|                    | A.baumannii<br>b/p-value/CI95      | Citrobact<br>b/p-value/CI95           | E.coli<br>b/p-value/CI95               | Enterobact<br>b/p-value/CI95 | K.pneumoniae<br>b/p-value/CI95        | Other Enterobact<br>b/p-value/CI95     | Other Nonfermenter<br>b/p-value/CI95 | P.aearuginosa<br>b/p-value/CI95       |
|--------------------|------------------------------------|---------------------------------------|----------------------------------------|------------------------------|---------------------------------------|----------------------------------------|--------------------------------------|---------------------------------------|
| Residency          |                                    |                                       |                                        |                              |                                       |                                        |                                      |                                       |
| Arabian Peninsula  | 0.220<br>0.2973<br>[-0.203,0.642]  | -0.005<br>0.9366<br>[-0.145,0.134]    | -0.319**<br>0.0129<br>[-0.567,-0.072]  | 0.000<br>.<br>[0.000,0.000]  | -0.138<br>0.5361<br>[-0.586,0.311]    | 0.041<br>0.6262<br>[-0.128,0.209]      | 0.000<br>.<br>[0.000,0.000]          | 0.202<br>0.1969<br>[-0.110,0.515]     |
| Other              | 0.026<br>0.9150<br>[-0.466,0.518]  | 0.020<br>0.8079<br>[-0.143,0.182]     | -0.390***<br>0.0096<br>[-0.678,-0.101] | 0.000<br>.<br>[0.000,0.000]  | -0.108<br>0.6779<br>[-0.630,0.415]    | 0.078<br>0.4261<br>[-0.118,0.274]      | 0.000<br>.<br>[0.000,0.000]          | 0.374**<br>0.0444<br>[0.010,0.738]    |
| Control variables  |                                    |                                       |                                        |                              |                                       |                                        |                                      |                                       |
| Age                | 0.004<br>0.7548<br>[-0.022,0.030]  | -0.011**<br>0.0131<br>[-0.020,-0.002] | 0.013*<br>0.0840<br>[-0.002,0.029]     | 0.000<br>.<br>[0.000,0.000]  | 0.017<br>0.2281<br>[-0.011,0.044]     | -0.014***<br>0.0089<br>[-0.025,-0.004] | 0.000<br>.<br>[0.000,0.000]          | -0.009<br>0.3586<br>[-0.028,0.010]    |
| Age × Age          | -0.000<br>0.8313<br>[-0.000,0.000] | 0.000**<br>0.0292<br>[0.000,0.000]    | -0.000**<br>0.0402<br>[-0.000,-0.000]  | 0.000<br>.<br>[0.000,0.000]  | -0.000<br>0.2974<br>[-0.000,0.000]    | 0.000**<br>0.0280<br>[0.000,0.000]     | 0.000<br>.<br>[0.000,0.000]          | 0.000<br>0.2216<br>[-0.000,0.000]     |
| Female             | -0.192<br>0.2410<br>[-0.519,0.135] | 0.008<br>0.8828<br>[-0.100,0.116]     | 0.146<br>0.1310<br>[-0.046,0.337]      | 0.000<br>.<br>[0.000,0.000]  | -0.082<br>0.6341<br>[-0.429,0.265]    | -0.049<br>0.4491<br>[-0.179,0.081]     | 0.000<br>.<br>[0.000,0.000]          | 0.169<br>0.1634<br>[-0.072,0.411]     |
| Oncological:yes    | -0.405<br>0.1268<br>[-0.930,0.121] | -0.005<br>0.9557<br>[-0.178,0.169]    | -0.215<br>0.1650<br>[-0.522,0.093]     | 0.000<br>.<br>[0.000,0.000]  | 0.501*<br>0.0769<br>[-0.057,1.059]    | -0.061<br>0.5590<br>[-0.270,0.149]     | 0.000<br>.<br>[0.000,0.000]          | 0.184<br>0.3421<br>[-0.204,0.573]     |
| History of ICU:yes | -0.185<br>0.3131<br>[-0.552,0.182] | 0.016<br>0.7867<br>[-0.105,0.137]     | 0.013<br>0.9056<br>[-0.202,0.227]      | 0.000<br>.<br>[0.000,0.000]  | 0.551***<br>0.0069<br>[0.162,0.941]   | -0.040<br>0.5823<br>[-0.186,0.106]     | 0.000<br>.<br>[0.000,0.000]          | -0.356**<br>0.0118<br>[-0.627,-0.084] |
| ICU:yes            | 0.000<br>.<br>[0.000,0.000]        | 0.000<br>.<br>[0.000,0.000]           | 0.000<br>.<br>[0.000,0.000]            | 0.000<br>.<br>[0.000,0.000]  | 0.000<br>.<br>[0.000,0.000]           | 0.000<br>.<br>[0.000,0.000]            | 0.000<br>.<br>[0.000,0.000]          | 0.000<br>.<br>[0.000,0.000]           |
| Days hospitalised  | 0.000<br>0.9925<br>[-0.004,0.004]  | 0.000<br>0.8851<br>[-0.001,0.002]     | 0.001<br>0.6700<br>[-0.002,0.003]      | 0.000<br>.<br>[0.000,0.000]  | -0.005**<br>0.0289<br>[-0.010,-0.001] | 0.003***<br>0.0006<br>[0.001,0.005]    | 0.000<br>.<br>[0.000,0.000]          | 0.001<br>0.4162<br>[-0.002,0.004]     |
| Constant           | 0.266<br>0.4816<br>[-0.495,1.028]  | 0.247*<br>0.0532<br>[-0.004,0.498]    | 0.158<br>0.4769<br>[-0.288,0.603]      | 0.000<br>.<br>[0.000,0.000]  | -0.059<br>0.8819<br>[-0.868,0.749]    | 0.306**<br>0.0484<br>[0.002,0.609]     | 0.000<br>.<br>[0.000,0.000]          | 0.083<br>0.7669<br>[-0.480,0.646]     |
| Observations       | 42                                 | 42                                    | 42                                     | 42                           | 42                                    | 42                                     | 42                                   | 42                                    |
| R <sup>2</sup>     | 0.212                              | 0.248                                 | 0.361                                  | .                            | 0.232                                 | 0.437                                  | .                                    | 0.367                                 |

Notes: Values of b show the estimated coefficients of linear probability models on the likelihood that the respective Species were detected, together with their p-value and confidence interval (95%). Baseline category for Ethnicity is German. Statistical significance level \*  $p < 0.10$ , \*\*  $p < 0.05$ , \*\*\*  $p < 0.01$ .

Table B8: Likelihood of Carbapenemases for different Residency among patients of Arabic Ethnicity - linear regression analysis

|                    | GES                                | KPC                         | NDM                                   | OXA-23                             | OXA-24-72                   | OXA-48                              | OXA-58                      | OXA-72                             | VIM                                   |
|--------------------|------------------------------------|-----------------------------|---------------------------------------|------------------------------------|-----------------------------|-------------------------------------|-----------------------------|------------------------------------|---------------------------------------|
|                    | b/p-value/CI95                     | b/p-value/CI95              | b/p-value/CI95                        | b/p-value/CI95                     | b/p-value/CI95              | b/p-value/CI95                      | b/p-value/CI95              | b/p-value/CI95                     | b/p-value/CI95                        |
| Residency          |                                    |                             |                                       |                                    |                             |                                     |                             |                                    |                                       |
| Arabian Peninsula  | 0.118<br>0.1086<br>[-0.028,0.264]  | 0.000<br>.<br>[0.000,0.000] | 0.324*<br>0.0526<br>[-0.004,0.653]    | -0.075<br>0.7174<br>[-0.491,0.342] | 0.000<br>.<br>[0.000,0.000] | -0.402*<br>0.0669<br>[-0.834,0.030] | 0.000<br>.<br>[0.000,0.000] | 0.004<br>0.9602<br>[-0.144,0.151]  | 0.135<br>0.3859<br>[-0.177,0.447]     |
| Other              | 0.038<br>0.6480<br>[-0.131,0.208]  | 0.000<br>.<br>[0.000,0.000] | 0.387**<br>0.0473<br>[0.005,0.770]    | -0.330<br>0.1762<br>[-0.815,0.156] | 0.000<br>.<br>[0.000,0.000] | -0.443*<br>0.0824<br>[-0.947,0.060] | 0.000<br>.<br>[0.000,0.000] | 0.147*<br>0.0921<br>[-0.025,0.318] | 0.183<br>0.3124<br>[-0.180,0.547]     |
| Control variables  |                                    |                             |                                       |                                    |                             |                                     |                             |                                    |                                       |
| Age                | -0.003<br>0.5366<br>[-0.012,0.006] | 0.000<br>.<br>[0.000,0.000] | 0.025**<br>0.0183<br>[0.004,0.045]    | 0.011<br>0.4011<br>[-0.015,0.036]  | 0.000<br>.<br>[0.000,0.000] | -0.017<br>0.2165<br>[-0.043,0.010]  | 0.000<br>.<br>[0.000,0.000] | -0.000<br>0.9452<br>[-0.009,0.009] | -0.008<br>0.4107<br>[-0.027,0.011]    |
| Age × Age          | 0.000<br>0.2324<br>[-0.000,0.000]  | 0.000<br>.<br>[0.000,0.000] | -0.000*<br>0.0513<br>[-0.000,0.000]   | -0.000<br>0.3464<br>[-0.000,0.000] | 0.000<br>.<br>[0.000,0.000] | 0.000<br>0.3875<br>[-0.000,0.000]   | 0.000<br>.<br>[0.000,0.000] | -0.000<br>0.9083<br>[-0.000,0.000] | 0.000<br>0.3440<br>[-0.000,0.000]     |
| Female             | -0.005<br>0.9285<br>[-0.118,0.108] | 0.000<br>.<br>[0.000,0.000] | 0.347***<br>0.0090<br>[0.093,0.600]   | -0.221<br>0.1715<br>[-0.543,0.101] | 0.000<br>.<br>[0.000,0.000] | -0.001<br>0.9929<br>[-0.336,0.333]  | 0.000<br>.<br>[0.000,0.000] | -0.030<br>0.6005<br>[-0.144,0.084] | 0.065<br>0.5849<br>[-0.176,0.307]     |
| Oncological:yes    | -0.051<br>0.5717<br>[-0.232,0.130] | 0.000<br>.<br>[0.000,0.000] | -0.307<br>0.1356<br>[-0.715,0.101]    | -0.274<br>0.2892<br>[-0.792,0.244] | 0.000<br>.<br>[0.000,0.000] | 0.306<br>0.2543<br>[-0.231,0.844]   | 0.000<br>.<br>[0.000,0.000] | -0.029<br>0.7514<br>[-0.212,0.155] | 0.231<br>0.2343<br>[-0.157,0.619]     |
| History of ICU:yes | -0.051<br>0.4214<br>[-0.177,0.076] | 0.000<br>.<br>[0.000,0.000] | -0.760**<br>0.5014<br>[-0.190,0.380]  | 0.353<br>0.8232<br>[-0.322,0.402]  | 0.000<br>.<br>[0.000,0.000] | 0.345*<br>0.0705<br>[-0.031,0.720]  | 0.000<br>.<br>[0.000,0.000] | -0.060<br>0.3515<br>[-0.188,0.069] | -0.295**<br>0.0340<br>[-0.566,-0.024] |
| ICU:yes            | 0.000<br>.<br>[0.000,0.000]        | 0.000<br>.<br>[0.000,0.000] | 0.000<br>.<br>[0.000,0.000]           | 0.000<br>.<br>[0.000,0.000]        | 0.000<br>.<br>[0.000,0.000] | 0.000<br>.<br>[0.000,0.000]         | 0.000<br>.<br>[0.000,0.000] | 0.000<br>.<br>[0.000,0.000]        | 0.000<br>.<br>[0.000,0.000]           |
| Days hospitalised  | 0.000<br>0.8431<br>[-0.001,0.002]  | 0.000<br>.<br>[0.000,0.000] | -0.000<br>0.7703<br>[-0.004,0.003]    | -0.001<br>0.6085<br>[-0.005,0.003] | 0.000<br>.<br>[0.000,0.000] | 0.000<br>0.9567<br>[-0.004,0.005]   | 0.000<br>.<br>[0.000,0.000] | 0.000<br>0.6980<br>[-0.001,0.002]  | 0.001<br>0.5155<br>[-0.002,0.004]     |
| Constant           | -0.051<br>0.6953<br>[-0.313,0.211] | 0.000<br>.<br>[0.000,0.000] | -0.760**<br>0.0134<br>[-1.351,-0.168] | 0.353<br>0.3455<br>[-0.397,1.103]  | 0.000<br>.<br>[0.000,0.000] | 0.951**<br>0.0182<br>[0.173,1.730]  | 0.000<br>.<br>[0.000,0.000] | 0.063<br>0.6314<br>[-0.202,0.329]  | 0.179<br>0.5220<br>[-0.383,0.741]     |
| Observations       | 42                                 | 42                          | 42                                    | 42                                 | 42                          | 42                                  | 42                          | 42                                 | 42                                    |
| R <sup>2</sup>     | 0.179                              | .                           | 0.371                                 | 0.192                              | .                           | 0.302                               | .                           | 0.157                              | 0.284                                 |

Notes: Values of b show the estimated coefficients of linear probability models on the likelihood that the respective Species were detected, together with their p-value and confidence interval (95%). Baseline category for Ethnicity is German. Statistical significance level \*  $p < 0.10$ , \*\*  $p < 0.05$ , \*\*\*  $p < 0.01$ .

## B.2 Univariate Linear Regressions

Table B9: Likelihood of colonization with carbapenemase-encoding Species for different Residency - linear regression analysis

|                   | A.baumannii<br>b/p-value/CI95       | Citrobact<br>b/p-value/CI95         | E.coli<br>b/p-value/CI95              | Enterobact<br>b/p-value/CI95          | K.pneumoniae<br>b/p-value/CI95      | Other Enterobact<br>b/p-value/CI95  | Other Nonfermenter<br>b/p-value/CI95 | P.aearuginosa<br>b/p-value/CI95     |
|-------------------|-------------------------------------|-------------------------------------|---------------------------------------|---------------------------------------|-------------------------------------|-------------------------------------|--------------------------------------|-------------------------------------|
| Residency         |                                     |                                     |                                       |                                       |                                     |                                     |                                      |                                     |
| Arabian Peninsula | 0.202***<br>0.0006<br>[0.087,0.316] | -0.040<br>0.3137<br>[-0.119,0.038]  | -0.029<br>0.5661<br>[-0.127,0.070]    | -0.124**<br>0.0198<br>[-0.229,-0.020] | 0.117<br>0.1208<br>[-0.031,0.265]   | -0.036<br>0.4180<br>[-0.125,0.052]  | -0.028<br>0.2021<br>[-0.071,0.015]   | -0.061<br>0.3480<br>[-0.189,0.067]  |
| Other             | 0.063<br>0.1188<br>[-0.016,0.143]   | 0.003<br>0.9236<br>[-0.052,0.057]   | -0.076**<br>0.0293<br>[-0.145,-0.008] | -0.072*<br>0.0530<br>[-0.145,0.001]   | 0.160***<br>0.0025<br>[0.057,0.263] | -0.008<br>0.8031<br>[-0.069,0.054]  | -0.028*<br>0.0677<br>[-0.058,0.002]  | -0.042<br>0.3541<br>[-0.131,0.047]  |
| Constant          | 0.108***<br>0.0000<br>[0.065,0.151] | 0.064***<br>0.0000<br>[0.034,0.094] | 0.124***<br>0.0000<br>[0.087,0.161]   | 0.148***<br>0.0000<br>[0.108,0.188]   | 0.240***<br>0.0000<br>[0.184,0.296] | 0.084***<br>0.0000<br>[0.051,0.117] | 0.028***<br>0.0008<br>[0.012,0.044]  | 0.204***<br>0.0000<br>[0.155,0.253] |
| Observations      | 397                                 | 397                                 | 397                                   | 397                                   | 397                                 | 397                                 | 397                                  | 397                                 |
| R <sup>2</sup>    | 0.031                               | 0.003                               | 0.012                                 | 0.019                                 | 0.025                               | 0.002                               | 0.011                                | 0.004                               |

Notes: Values of b show the estimated coefficients of linear probability models on the likelihood that the respective Species were detected, together with their p-value and confidence interval (95%). Baseline category for Residency is Germany. Statistical significance level \*  $p < 0.10$ , \*\*  $p < 0.05$ , \*\*\*  $p < 0.01$ .

Table B10: Likelihood of colonization with carbapenemase-encoding Species for different Ethnicity - linear regression analysis

|                | A.baumannii<br>b/p-value/CI95       | Citrobact<br>b/p-value/CI95         | E.coli<br>b/p-value/CI95            | Enterobact<br>b/p-value/CI95           | K.pneumoniae<br>b/p-value/CI95      | Other Enterobact<br>b/p-value/CI95  | Other Nonfermenter<br>b/p-value/CI95 | P.aearuginosa<br>b/p-value/CI95     |
|----------------|-------------------------------------|-------------------------------------|-------------------------------------|----------------------------------------|-------------------------------------|-------------------------------------|--------------------------------------|-------------------------------------|
| Ethnicity      |                                     |                                     |                                     |                                        |                                     |                                     |                                      |                                     |
| Arabic         | 0.182***<br>0.0015<br>[0.070,0.294] | -0.052<br>0.1868<br>[-0.128,0.025]  | 0.010<br>0.8343<br>[-0.087,0.107]   | -0.149***<br>0.0043<br>[-0.251,-0.047] | 0.134*<br>0.0697<br>[-0.011,0.279]  | -0.025<br>0.5739<br>[-0.111,0.062]  | -0.029<br>0.1820<br>[-0.071,0.014]   | -0.072<br>0.2562<br>[-0.197,0.053]  |
| Kashmiri       | 0.052<br>0.6966<br>[-0.210,0.314]   | -0.074<br>0.4161<br>[-0.254,0.105]  | -0.103<br>0.3715<br>[-0.330,0.124]  | -0.006<br>0.9611<br>[-0.244,0.232]     | 0.319*<br>0.0652<br>[-0.020,0.659]  | 0.073<br>0.4815<br>[-0.130,0.275]   | -0.029<br>0.5680<br>[-0.128,0.071]   | -0.231<br>0.1206<br>[-0.524,0.061]  |
| Punjabi        | 0.222**<br>0.0139<br>[0.045,0.398]  | -0.074<br>0.2273<br>[-0.195,0.047]  | -0.103<br>0.1846<br>[-0.256,0.050]  | -0.149*<br>0.0689<br>[-0.309,0.012]    | 0.310***<br>0.0079<br>[0.082,0.539] | -0.070<br>0.3119<br>[-0.207,0.066]  | -0.029<br>0.3965<br>[-0.096,0.038]   | -0.106<br>0.2887<br>[-0.303,0.091]  |
| Somalian       | 0.144*<br>0.0983<br>[-0.027,0.316]  | -0.074<br>0.2143<br>[-0.192,0.043]  | 0.132*<br>0.0815<br>[-0.017,0.281]  | -0.149*<br>0.0613<br>[-0.305,0.007]    | 0.101<br>0.3728<br>[-0.121,0.323]   | 0.047<br>0.4826<br>[-0.085,0.180]   | -0.029<br>0.3831<br>[-0.094,0.036]   | -0.173*<br>0.0771<br>[-0.364,0.019] |
| Turkish        | 0.209**<br>0.0100<br>[0.050,0.368]  | -0.074<br>0.1805<br>[-0.183,0.035]  | -0.053<br>0.4472<br>[-0.191,0.084]  | -0.149**<br>0.0436<br>[-0.293,-0.004]  | 0.198*<br>0.0597<br>[-0.008,0.404]  | 0.030<br>0.6345<br>[-0.093,0.153]   | -0.029<br>0.3469<br>[-0.089,0.031]   | -0.131<br>0.1463<br>[-0.309,0.046]  |
| Other          | 0.066<br>0.2184<br>[-0.039,0.171]   | 0.024<br>0.5197<br>[-0.049,0.096]   | -0.005<br>0.9097<br>[-0.096,0.086]  | 0.028<br>0.5694<br>[-0.068,0.123]      | -0.036<br>0.6005<br>[-0.173,0.100]  | 0.067<br>0.1065<br>[-0.014,0.148]   | -0.029<br>0.1558<br>[-0.069,0.011]   | -0.114*<br>0.0578<br>[-0.231,0.004] |
| Constant       | 0.091***<br>0.0001<br>[0.047,0.135] | 0.074***<br>0.0000<br>[0.044,0.104] | 0.103***<br>0.0000<br>[0.065,0.141] | 0.149***<br>0.0000<br>[0.109,0.189]    | 0.252***<br>0.0000<br>[0.195,0.309] | 0.070***<br>0.0001<br>[0.036,0.104] | 0.029***<br>0.0007<br>[0.012,0.046]  | 0.231***<br>0.0000<br>[0.182,0.280] |
| Observations   | 397                                 | 397                                 | 397                                 | 397                                    | 397                                 | 397                                 | 397                                  | 397                                 |
| R <sup>2</sup> | 0.050                               | 0.018                               | 0.017                               | 0.043                                  | 0.041                               | 0.014                               | 0.011                                | 0.025                               |

Notes: Values of b show the estimated coefficients of linear probability models on the likelihood that the respective Species were detected, together with their p-value and confidence interval (95%). Baseline category for Ethnicity is German. Statistical significance level \*  $p < 0.10$ , \*\*  $p < 0.05$ , \*\*\*  $p < 0.01$ .

Table B11: Likelihood of Carbapenemases for different Residency - linear regression analysis

|                   | GES                                | KPC                                   | NDM                                 | OXA-23                              | OXA-24-72                          | OXA-48                              | OXA-58                             | OXA-72                             | VIM                                    |
|-------------------|------------------------------------|---------------------------------------|-------------------------------------|-------------------------------------|------------------------------------|-------------------------------------|------------------------------------|------------------------------------|----------------------------------------|
|                   | b/p-value/CI95                     | b/p-value/CI95                        | b/p-value/CI95                      | b/p-value/CI95                      | b/p-value/CI95                     | b/p-value/CI95                      | b/p-value/CI95                     | b/p-value/CI95                     | b/p-value/CI95                         |
| Residency         |                                    |                                       |                                     |                                     |                                    |                                     |                                    |                                    |                                        |
| Arabian Peninsula | 0.032<br>0.1507<br>[-0.012,0.075]  | -0.100**<br>0.0254<br>[-0.188,-0.012] | -0.017<br>0.7859<br>[-0.143,0.108]  | 0.202***<br>0.0001<br>[0.098,0.305] | -0.004<br>0.8099<br>[-0.037,0.029] | 0.101<br>0.2043<br>[-0.055,0.257]   | 0.000<br>1.0000<br>[-0.016,0.016]  | -0.008<br>0.6319<br>[-0.041,0.025] | -0.221***<br>0.0032<br>[-0.368,-0.075] |
| Other             | -0.006<br>0.6726<br>[-0.037,0.024] | -0.043<br>0.1688<br>[-0.104,0.018]    | -0.022<br>0.6196<br>[-0.110,0.065]  | 0.040<br>0.2784<br>[-0.032,0.112]   | 0.025**<br>0.0346<br>[0.002,0.047] | 0.144***<br>0.0097<br>[0.035,0.252] | 0.010<br>0.1032<br>[-0.002,0.021]  | 0.011<br>0.3431<br>[-0.012,0.034]  | -0.183***<br>0.0005<br>[-0.285,-0.081] |
| Constant          | 0.016*<br>0.0554<br>[-0.000,0.032] | 0.100***<br>0.0000<br>[0.067,0.133]   | 0.184***<br>0.0000<br>[0.136,0.232] | 0.084***<br>0.0000<br>[0.045,0.123] | 0.004<br>0.5259<br>[-0.008,0.016]  | 0.304***<br>0.0000<br>[0.245,0.363] | -0.000<br>1.0000<br>[-0.006,0.006] | 0.008<br>0.2070<br>[-0.004,0.020]  | 0.364***<br>0.0000<br>[0.308,0.420]    |
| Observations      | 397                                | 397                                   | 397                                 | 397                                 | 397                                | 397                                 | 397                                | 397                                | 397                                    |
| R <sup>2</sup>    | 0.007                              | 0.015                                 | 0.001                               | 0.036                               | 0.012                              | 0.018                               | 0.007                              | 0.003                              | 0.043                                  |

Notes: Values of b show the estimated coefficients of linear probability models on the likelihood that the respective carbapenemases were detected, together with their p-value and confidence interval (95%). Baseline category for Residency is Germany. Statistical significance level \*  $p < 0.10$ , \*\*  $p < 0.05$ , \*\*\*  $p < 0.01$ .

Table B12: Likelihood of Carbapenemases for different Ethnicity - linear regression analysis

|                | GES                                     | KPC                                   | NDM                                 | OXA-23                              | OXA-24-72                          | OXA-48                              | OXA-58                             | OXA-72                              | VIM                                    |
|----------------|-----------------------------------------|---------------------------------------|-------------------------------------|-------------------------------------|------------------------------------|-------------------------------------|------------------------------------|-------------------------------------|----------------------------------------|
|                | b/p-value/CI95                          | b/p-value/CI95                        | b/p-value/CI95                      | b/p-value/CI95                      | b/p-value/CI95                     | b/p-value/CI95                      | b/p-value/CI95                     | b/p-value/CI95                      | b/p-value/CI95                         |
| Ethnicity      |                                         |                                       |                                     |                                     |                                    |                                     |                                    |                                     |                                        |
| Arabic         | 0.002<br>0.9243<br>[-0.041,0.045]       | -0.103**<br>0.0189<br>[-0.189,-0.017] | 0.033<br>0.5951<br>[-0.089,0.155]   | 0.176***<br>0.0007<br>[0.075,0.276] | -0.004<br>0.7999<br>[-0.036,0.028] | 0.093<br>0.2358<br>[-0.061,0.247]   | -0.004<br>0.6181<br>[-0.020,0.012] | 0.023<br>0.1609<br>[-0.009,0.055]   | -0.231***<br>0.0017<br>[-0.375,-0.088] |
| Kashmiri       | -0.021<br>0.6846<br>[-0.121,0.079]      | -0.103<br>0.3142<br>[-0.305,0.098]    | -0.006<br>0.9676<br>[-0.292,0.280]  | 0.068<br>0.5670<br>[-0.167,0.303]   | -0.004<br>0.9137<br>[-0.079,0.071] | 0.090<br>0.6245<br>[-0.270,0.450]   | -0.004<br>0.8312<br>[-0.042,0.034] | 0.000<br>1.0000<br>[-0.074,0.074]   | -0.082<br>0.6319<br>[-0.419,0.254]     |
| Punjabi        | -0.021<br>0.5464<br>[-0.088,0.047]      | -0.103<br>0.1352<br>[-0.239,0.032]    | 0.039<br>0.6925<br>[-0.154,0.231]   | 0.176**<br>0.0297<br>[0.017,0.334]  | 0.058**<br>0.0235<br>[0.008,0.109] | 0.099<br>0.4242<br>[-0.144,0.341]   | -0.004<br>0.7516<br>[-0.030,0.022] | 0.000<br>1.0000<br>[-0.050,0.050]   | -0.180<br>0.1185<br>[-0.407,0.046]     |
| Somalian       | -0.021<br>0.5349<br>[-0.086,0.045]      | -0.103<br>0.1244<br>[-0.235,0.029]    | 0.263***<br>0.0060<br>[0.076,0.450] | 0.043<br>0.5805<br>[-0.111,0.197]   | 0.055**<br>0.0289<br>[0.006,0.104] | 0.132<br>0.2724<br>[-0.104,0.367]   | -0.004<br>0.7447<br>[-0.029,0.021] | 0.000<br>1.0000<br>[-0.049,0.049]   | -0.250**<br>0.0261<br>[-0.470,-0.030]  |
| Turkish        | 0.5034<br>0.081,0.040<br>[-0.081,0.040] | 0.3920<br>0.0699<br>[-0.176,0.069]    | 0.5808<br>0.125<br>[-0.222,0.125]   | 0.0002<br>0.418<br>[0.133,0.418]    | 0.8583<br>0.041<br>[-0.050,0.041]  | 0.3179<br>0.330<br>[-0.107,0.330]   | 0.7254<br>0.019<br>[-0.027,0.019]  | 1.0000<br>0.045<br>[-0.045,0.045]   | 0.0024<br>0.114<br>[-0.522,-0.114]     |
| Other          | -0.001<br>0.9589<br>[-0.041,0.039]      | -0.005<br>0.8983<br>[-0.086,0.076]    | 0.106*<br>0.0701<br>[-0.009,0.221]  | -0.016<br>0.7462<br>[-0.110,0.079]  | 0.015<br>0.3130<br>[-0.015,0.046]  | -0.104<br>0.1603<br>[-0.248,0.041]  | -0.004<br>0.5959<br>[-0.019,0.011] | 0.059***<br>0.0001<br>[0.029,0.089] | -0.113<br>0.1016<br>[-0.248,0.022]     |
| Constant       | 0.0158<br>0.021**<br>[0.004,0.037]      | 0.0000<br>0.103***<br>[0.070,0.137]   | 0.0000<br>0.149***<br>[0.101,0.197] | 0.0002<br>0.074***<br>[0.035,0.114] | 0.5183<br>0.004<br>[-0.008,0.017]  | 0.0000<br>0.339***<br>[0.278,0.399] | 0.2041<br>0.004<br>[-0.002,0.011]  | 1.0000<br>-0.000<br>[-0.012,0.012]  | 0.0000<br>0.368***<br>[0.311,0.424]    |
| Observations   | 397                                     | 397                                   | 397                                 | 397                                 | 397                                | 397                                 | 397                                | 397                                 | 397                                    |
| R <sup>2</sup> | 0.003                                   | 0.025                                 | 0.027                               | 0.068                               | 0.026                              | 0.018                               | 0.002                              | 0.040                               | 0.053                                  |

Notes: Values of b show the estimated coefficients of linear probability models on the likelihood that the respective carbapenemases were detected, together with their p-value and confidence interval (95%). Baseline category for Ethnicity is German. Statistical significance level \*  $p < 0.10$ , \*\*  $p < 0.05$ , \*\*\*  $p < 0.01$ .

### B.3 Logit Regressions

Table B13: Likelihood of colonization with carbapenemase-encoding Species for different Residency - marginal effects after logit regression

|                    | A.baumannii<br>b/p-value/CI95 | Citrobact<br>b/p-value/CI95 | E.coli<br>b/p-value/CI95 | Enterobact<br>b/p-value/CI95 | K.pneumoniae<br>b/p-value/CI95 | Other Enterobact<br>b/p-value/CI95 | Other Nonfermenter<br>b/p-value/CI95 | P.aeruginosa<br>b/p-value/CI95 |
|--------------------|-------------------------------|-----------------------------|--------------------------|------------------------------|--------------------------------|------------------------------------|--------------------------------------|--------------------------------|
| Residency          |                               |                             |                          |                              |                                |                                    |                                      |                                |
| Arabian Peninsula  | 0.099*                        | -0.046                      | -0.012                   | -0.194*                      | 0.088                          | -0.073                             | 0.000                                | 0.002                          |
|                    | 0.0501                        | 0.4552                      | 0.8178                   | 0.0693                       | 0.2555                         | 0.2258                             | .                                    | 0.9791                         |
|                    | [-0.000,0.199]                | [-0.168,0.075]              | [-0.117,0.092]           | [-0.404,0.015]               | [-0.064,0.239]                 | [-0.192,0.045]                     | [0.000,0.000]                        | [-0.143,0.146]                 |
| Other              | -0.007                        | 0.024                       | -0.084*                  | -0.051                       | 0.111*                         | 0.010                              | 0.000                                | 0.026                          |
|                    | 0.8745                        | 0.4713                      | 0.0816                   | 0.2828                       | 0.0506                         | 0.7852                             | .                                    | 0.6145                         |
|                    | [-0.090,0.076]                | [-0.042,0.091]              | [-0.179,0.011]           | [-0.143,0.042]               | [-0.000,0.223]                 | [-0.064,0.084]                     | [0.000,0.000]                        | [-0.075,0.127]                 |
| Control variables  |                               |                             |                          |                              |                                |                                    |                                      |                                |
| Age                | -0.003***                     | 0.001                       | 0.001                    | 0.000                        | -0.001                         | 0.000                              | 0.004                                | 0.001                          |
|                    | 0.0010                        | 0.5040                      | 0.3466                   | 0.8521                       | 0.5396                         | 0.9077                             | 0.1284                               | 0.4726                         |
|                    | [-0.005,-0.001]               | [-0.001,0.003]              | [-0.001,0.003]           | [-0.002,0.003]               | [-0.004,0.002]                 | [-0.002,0.002]                     | [-0.001,0.008]                       | [-0.002,0.004]                 |
| Female             | -0.022                        | -0.068*                     | 0.051*                   | 0.021                        | 0.067                          | -0.001                             | -0.001                               | -0.066                         |
|                    | 0.5733                        | 0.0682                      | 0.0975                   | 0.5450                       | 0.1756                         | 0.9698                             | 0.9812                               | 0.1325                         |
|                    | [-0.099,0.055]                | [-0.141,0.005]              | [-0.009,0.112]           | [-0.047,0.088]               | [-0.030,0.163]                 | [-0.060,0.058]                     | [-0.089,0.087]                       | [-0.151,0.020]                 |
| Oncological:yes    | -0.228***                     | 0.034                       | 0.013                    | -0.018                       | -0.134*                        | -0.011                             | 0.131**                              | 0.148***                       |
|                    | 0.0076                        | 0.3066                      | 0.7412                   | 0.6973                       | 0.0639                         | 0.7697                             | 0.0402                               | 0.0012                         |
|                    | [-0.396,-0.061]               | [-0.031,0.100]              | [-0.065,0.092]           | [-0.109,0.073]               | [-0.275,0.008]                 | [-0.087,0.064]                     | [0.006,0.255]                        | [0.059,0.237]                  |
| History of ICU:yes | 0.069                         | 0.071*                      | 0.019                    | 0.017                        | -0.071                         | -0.036                             | 0.000                                | 0.017                          |
|                    | 0.3252                        | 0.0961                      | 0.7287                   | 0.7937                       | 0.4889                         | 0.5490                             | .                                    | 0.8059                         |
|                    | [-0.069,0.207]                | [-0.013,0.154]              | [-0.090,0.129]           | [-0.108,0.141]               | [-0.271,0.129]                 | [-0.155,0.082]                     | [0.000,0.000]                        | [-0.117,0.151]                 |
| ICU:yes            | -0.154**                      | -0.044                      | -0.018                   | 0.056                        | 0.056                          | 0.078                              | 0.000                                | -0.030                         |
|                    | 0.0340                        | 0.2811                      | 0.7409                   | 0.3533                       | 0.5811                         | 0.1896                             | .                                    | 0.6642                         |
|                    | [-0.297,-0.012]               | [-0.123,0.036]              | [-0.128,0.091]           | [-0.063,0.175]               | [-0.144,0.256]                 | [-0.038,0.194]                     | [0.000,0.000]                        | [-0.166,0.106]                 |
| Days hospitalised  | -0.001*                       | -0.000                      | -0.001                   | -0.000                       | -0.000                         | 0.001**                            | -0.000                               | 0.001**                        |
|                    | 0.0567                        | 0.4039                      | 0.2003                   | 0.5667                       | 0.3767                         | 0.0165                             | 0.9711                               | 0.0189                         |
|                    | [-0.002,0.000]                | [-0.001,0.000]              | [-0.001,0.000]           | [-0.001,0.001]               | [-0.002,0.001]                 | [0.000,0.001]                      | [-0.001,0.001]                       | [0.000,0.001]                  |
| Observations       | 390                           | 390                         | 390                      | 390                          | 390                            | 390                                | 118                                  | 390                            |

Notes: Values of b show the estimated marginal effects of logit models on the likelihood that the respective Species were detected, together with their p-value and confidence interval (95%). Baseline category for Residency is Germany. Statistical significance level \*  $p < 0.10$ , \*\*  $p < 0.05$ , \*\*\*  $p < 0.01$ .

Table B14: Likelihood of colonization with carbapenemase-encoding Species for different Ethnicity - marginal effects after logit regression

|                    | A.baumannii<br>b/p-value/CI95          | Citrobact<br>b/p-value/CI95           | E.coli<br>b/p-value/CI95           | Enterobact<br>b/p-value/CI95       | K.pneumoniae<br>b/p-value/CI95        | Other Enterobact<br>b/p-value/CI95  | Other Nonfermenter<br>b/p-value/CI95 | P.aearuginosa<br>b/p-value/CI95     |
|--------------------|----------------------------------------|---------------------------------------|------------------------------------|------------------------------------|---------------------------------------|-------------------------------------|--------------------------------------|-------------------------------------|
| Ethnicity          |                                        |                                       |                                    |                                    |                                       |                                     |                                      |                                     |
| Arabic             | 0.123**<br>0.0131<br>[0.026,0.220]     | -0.070<br>0.3243<br>[-0.209,0.069]    | -0.000<br>0.9965<br>[-0.109,0.108] | 0.000<br>.<br>[0.000,0.000]        | 0.096<br>0.1850<br>[-0.046,0.237]     | -0.038<br>0.5218<br>[-0.155,0.079]  | 0.000<br>.<br>[0.000,0.000]          | -0.003<br>0.9575<br>[-0.131,0.124]  |
| Kashmiri           | -0.004<br>0.9735<br>[-0.248,0.240]     | 0.000<br>.<br>[0.000,0.000]           | 0.000<br>.<br>[0.000,0.000]        | 0.007<br>0.9598<br>[-0.273,0.288]  | 0.237<br>0.1167<br>[-0.059,0.533]     | 0.083<br>0.3197<br>[-0.080,0.246]   | 0.000<br>.<br>[0.000,0.000]          | 0.000<br>.<br>[0.000,0.000]         |
| Punjabi            | 0.085<br>0.2337<br>[-0.055,0.224]      | 0.000<br>.<br>[0.000,0.000]           | 0.000<br>.<br>[0.000,0.000]        | 0.000<br>.<br>[0.000,0.000]        | 0.247**<br>0.0204<br>[0.038,0.455]    | 0.000<br>.<br>[0.000,0.000]         | 0.000<br>.<br>[0.000,0.000]          | -0.088<br>0.4778<br>[-0.329,0.154]  |
| Somalian           | 0.104<br>0.1730<br>[-0.045,0.253]      | 0.000<br>.<br>[0.000,0.000]           | 0.112*<br>0.0677<br>[-0.008,0.232] | 0.000<br>.<br>[0.000,0.000]        | 0.101<br>0.3465<br>[-0.109,0.312]     | 0.062<br>0.3225<br>[-0.061,0.184]   | 0.000<br>.<br>[0.000,0.000]          | -0.201<br>0.1582<br>[-0.481,0.078]  |
| Turkish            | 0.091<br>0.1553<br>[-0.035,0.218]      | 0.000<br>.<br>[0.000,0.000]           | -0.051<br>0.6059<br>[-0.244,0.142] | 0.000<br>.<br>[0.000,0.000]        | 0.153<br>0.1088<br>[-0.034,0.341]     | 0.055<br>0.3680<br>[-0.064,0.174]   | 0.000<br>.<br>[0.000,0.000]          | -0.093<br>0.3814<br>[-0.302,0.115]  |
| Other              | 0.026<br>0.6162<br>[-0.077,0.129]      | 0.026<br>0.4908<br>[-0.048,0.100]     | 0.003<br>0.9504<br>[-0.094,0.100]  | 0.032<br>0.5694<br>[-0.078,0.141]  | -0.053<br>0.4792<br>[-0.200,0.094]    | 0.070*<br>0.0680<br>[-0.005,0.146]  | 0.000<br>.<br>[0.000,0.000]          | -0.106<br>0.1330<br>[-0.244,0.032]  |
| Control variables  |                                        |                                       |                                    |                                    |                                       |                                     |                                      |                                     |
| Age                | -0.003***<br>0.0036<br>[-0.005,-0.001] | 0.000<br>0.6878<br>[-0.002,0.003]     | 0.001<br>0.2953<br>[-0.001,0.004]  | 0.000<br>0.9871<br>[-0.003,0.003]  | -0.000<br>0.7357<br>[-0.003,0.002]    | 0.001<br>0.6193<br>[-0.002,0.003]   | 0.004*<br>0.0580<br>[-0.000,0.008]   | 0.000<br>0.9593<br>[-0.003,0.003]   |
| Female             | -0.012<br>0.7613<br>[-0.090,0.066]     | -0.090**<br>0.0443<br>[-0.177,-0.002] | 0.050<br>0.1298<br>[-0.015,0.115]  | 0.015<br>0.7362<br>[-0.073,0.104]  | 0.080<br>0.1001<br>[-0.015,0.176]     | -0.006<br>0.8382<br>[-0.068,0.055]  | 0.022<br>0.5816<br>[-0.055,0.099]    | -0.064<br>0.1427<br>[-0.151,0.022]  |
| Oncological:yes    | -0.222***<br>0.0088<br>[-0.388,-0.056] | 0.022<br>0.5430<br>[-0.049,0.094]     | 0.019<br>0.6547<br>[-0.063,0.101]  | -0.015<br>0.7934<br>[-0.131,0.100] | -0.149**<br>0.0323<br>[-0.285,-0.013] | -0.022<br>0.5835<br>[-0.099,0.056]  | 0.173***<br>0.0045<br>[0.054,0.293]  | 0.132***<br>0.0021<br>[0.048,0.216] |
| History of ICU:yes | 0.086<br>0.1953<br>[-0.044,0.216]      | 0.059<br>0.1848<br>[-0.028,0.145]     | 0.050<br>0.3873<br>[-0.064,0.164]  | 0.024<br>0.7621<br>[-0.130,0.177]  | -0.101<br>0.2982<br>[-0.292,0.089]    | -0.048<br>0.4303<br>[-0.166,0.071]  | 0.000<br>.<br>[0.000,0.000]          | 0.001<br>0.9846<br>[-0.128,0.130]   |
| ICU:yes            | -0.157**<br>0.0294<br>[-0.298,-0.016]  | -0.050<br>0.2890<br>[-0.143,0.043]    | -0.017<br>0.7751<br>[-0.134,0.100] | 0.078<br>0.3164<br>[-0.075,0.232]  | 0.063<br>0.5351<br>[-0.136,0.261]     | 0.093<br>0.1279<br>[-0.027,0.214]   | 0.000<br>.<br>[0.000,0.000]          | -0.044<br>0.5329<br>[-0.182,0.094]  |
| Days hospitalised  | -0.001*<br>0.0821<br>[-0.002,0.000]    | -0.000<br>0.3634<br>[-0.001,0.000]    | -0.001<br>0.2071<br>[-0.001,0.000] | -0.000<br>0.4897<br>[-0.001,0.001] | -0.000<br>0.4377<br>[-0.001,0.001]    | 0.001***<br>0.0083<br>[0.000,0.001] | 0.000<br>0.8265<br>[-0.001,0.001]    | 0.001**<br>0.0192<br>[0.000,0.001]  |
| Observations       | 390                                    | 330                                   | 367                                | 295                                | 390                                   | 374                                 | 135                                  | 383                                 |

Notes: Values of b show the estimated marginal effects of logit models on the likelihood that the respective Species were detected, together with their p-value and confidence interval (95%). Baseline category for Ethnicity is German. Statistical significance level \*  $p < 0.10$ , \*\*  $p < 0.05$ , \*\*\*  $p < 0.01$ .

Table B15: Likelihood of Carbapenemases for different Residency - marginal effects after logit regression

|                    | GES                                    | KPC                                 | NDM                                | OXA-23                                | OXA-24-72                          | OXA-48                                | OXA-58                      | OXA-72                              | VIM                                   |
|--------------------|----------------------------------------|-------------------------------------|------------------------------------|---------------------------------------|------------------------------------|---------------------------------------|-----------------------------|-------------------------------------|---------------------------------------|
|                    | b/p-value/CI95                         | b/p-value/CI95                      | b/p-value/CI95                     | b/p-value/CI95                        | b/p-value/CI95                     | b/p-value/CI95                        | b/p-value/CI95              | b/p-value/CI95                      | b/p-value/CI95                        |
| Residency          |                                        |                                     |                                    |                                       |                                    |                                       |                             |                                     |                                       |
| Arabian Peninsula  | 0.035*<br>0.0742<br>[-0.003,0.074]     | 0.000<br>.<br>[0.000,0.000]         | -0.011<br>0.8774<br>[-0.146,0.125] | 0.106**<br>0.0172<br>[0.019,0.194]    | 0.000<br>.<br>[0.000,0.000]        | 0.066<br>0.4221<br>[-0.094,0.226]     | 0.000<br>.<br>[0.000,0.000] | 0.000<br>.<br>[0.000,0.000]         | -0.192**<br>0.0350<br>[-0.370,-0.014] |
| Other              | -0.010<br>0.6136<br>[-0.051,0.030]     | 0.055<br>0.3567<br>[-0.062,0.171]   | 0.004<br>0.9335<br>[-0.097,0.106]  | -0.009<br>0.8221<br>[-0.088,0.070]    | 0.048*<br>0.0698<br>[-0.004,0.100] | 0.062<br>0.3007<br>[-0.056,0.181]     | 0.000<br>.<br>[0.000,0.000] | 0.001<br>0.9636<br>[-0.044,0.046]   | -0.093<br>0.1267<br>[-0.212,0.026]    |
| Control variables  |                                        |                                     |                                    |                                       |                                    |                                       |                             |                                     |                                       |
| Age                | 0.000<br>0.2349<br>[-0.000,0.001]      | 0.001<br>0.4879<br>[-0.002,0.004]   | 0.001<br>0.2965<br>[-0.001,0.004]  | -0.002*<br>0.0617<br>[-0.003,0.000]   | 0.000<br>0.8261<br>[-0.002,0.002]  | -0.001<br>0.3928<br>[-0.004,0.002]    | 0.000<br>.<br>[0.000,0.000] | -0.001*<br>0.0607<br>[-0.002,0.000] | 0.002<br>0.2781<br>[-0.001,0.005]     |
| Female             | 0.007<br>0.5971<br>[-0.019,0.033]      | -0.002<br>0.9497<br>[-0.080,0.075]  | 0.070*<br>0.0775<br>[-0.008,0.147] | -0.051<br>0.1860<br>[-0.125,0.024]    | 0.038<br>0.1143<br>[-0.009,0.085]  | 0.089*<br>0.0790<br>[-0.010,0.189]    | 0.000<br>.<br>[0.000,0.000] | -0.001<br>0.9803<br>[-0.052,0.051]  | -0.120**<br>0.0145<br>[-0.217,-0.024] |
| Oncological:yes    | 0.020<br>0.2754<br>[-0.016,0.056]      | 0.000<br>.<br>[0.000,0.000]         | 0.120**<br>0.0125<br>[0.026,0.214] | -0.161**<br>0.0291<br>[-0.306,-0.016] | 0.000<br>.<br>[0.000,0.000]        | -0.146**<br>0.0393<br>[-0.284,-0.007] | 0.000<br>.<br>[0.000,0.000] | 0.000<br>.<br>[0.000,0.000]         | 0.229***<br>0.0000<br>[0.125,0.334]   |
| History of ICU:yes | -0.274***<br>0.0033<br>[-0.457,-0.091] | 0.229***<br>0.0005<br>[0.099,0.360] | 0.019<br>0.8041<br>[-0.128,0.165]  | 0.014<br>0.8432<br>[-0.122,0.149]     | 0.000<br>.<br>[0.000,0.000]        | -0.257**<br>0.0171<br>[-0.468,-0.046] | 0.000<br>.<br>[0.000,0.000] | 0.000<br>.<br>[0.000,0.000]         | 0.014<br>0.8613<br>[-0.146,0.174]     |
| ICU:yes            | 0.257***<br>0.0030<br>[0.088,0.427]    | -0.048<br>0.3067<br>[-0.140,0.044]  | -0.039<br>0.6122<br>[-0.188,0.111] | -0.052<br>0.4600<br>[-0.189,0.086]    | 0.000<br>.<br>[0.000,0.000]        | 0.138<br>0.2092<br>[-0.078,0.354]     | 0.000<br>.<br>[0.000,0.000] | 0.000<br>.<br>[0.000,0.000]         | 0.070<br>0.3852<br>[-0.088,0.229]     |
| Days hospitalised  | -0.000<br>0.2856<br>[-0.001,0.000]     | -0.000<br>0.8170<br>[-0.001,0.001]  | -0.000<br>0.3542<br>[-0.001,0.000] | -0.001<br>0.1930<br>[-0.002,0.000]    | -0.001<br>0.2850<br>[-0.003,0.001] | 0.001*<br>0.0538<br>[-0.000,0.002]    | 0.000<br>.<br>[0.000,0.000] | -0.001<br>0.3728<br>[-0.004,0.001]  | 0.000<br>0.5372<br>[-0.001,0.001]     |
| Observations       | 390                                    | 287                                 | 390                                | 390                                   | 174                                | 390                                   | 76                          | 174                                 | 390                                   |

Notes: Values of b show the estimated marginal effects of logit models on the likelihood that the respective carbapenemases were detected, together with their p-value and confidence interval (95%). Baseline category for Residency is Germany. Statistical significance level \*  $p < 0.10$ , \*\*  $p < 0.05$ , \*\*\*  $p < 0.01$ .

Table B16: Likelihood of Carbapenemases for different Ethnicity - marginal effects after logit regression

|                    | GES                                  | KPC                                 | NDM                                | OXA-23                                | OXA-24-72                          | OXA-48                                 | OXA-58                         | OXA-72                              | VIM                                   |
|--------------------|--------------------------------------|-------------------------------------|------------------------------------|---------------------------------------|------------------------------------|----------------------------------------|--------------------------------|-------------------------------------|---------------------------------------|
|                    | b/p-value/CI95                       | b/p-value/CI95                      | b/p-value/CI95                     | b/p-value/CI95                        | b/p-value/CI95                     | b/p-value/CI95                         | b/p-value/CI95                 | b/p-value/CI95                      | b/p-value/CI95                        |
| Ethnicity          |                                      |                                     |                                    |                                       |                                    |                                        |                                |                                     |                                       |
| Arabic             | 0.013<br>0.5892<br>[-0.034,0.060]    | 0.000<br>.<br>[0.000,0.000]         | 0.061<br>0.3379<br>[-0.064,0.186]  | 0.115***<br>0.0080<br>[0.030,0.200]   | 0.000<br>.<br>[0.000,0.000]        | 0.033<br>0.6770<br>[-0.121,0.186]      | 0.000<br>.<br>[0.000,0.000]    | -0.066<br>0.4746<br>[-0.248,0.115]  | -0.196**<br>0.0230<br>[-0.365,-0.027] |
| Kashmiri           | 0.000<br>.<br>[0.000,0.000]          | 0.000<br>.<br>[0.000,0.000]         | 0.038<br>0.8038<br>[-0.260,0.335]  | 0.030<br>0.7750<br>[-0.175,0.235]     | 0.000<br>.<br>[0.000,0.000]        | 0.039<br>0.8171<br>[-0.290,0.368]      | 0.000<br>.<br>[0.000,0.000]    | 0.000<br>.<br>[0.000,0.000]         | 0.017<br>0.9126<br>[-0.283,0.317]     |
| Punjabi            | 0.000<br>.<br>[0.000,0.000]          | 0.000<br>.<br>[0.000,0.000]         | 0.108<br>0.2653<br>[-0.082,0.297]  | 0.071<br>0.2668<br>[-0.054,0.196]     | 0.302<br>0.6965<br>[-1.217,1.821]  | 0.023<br>0.8457<br>[-0.210,0.256]      | 0.000<br>.<br>[0.000,0.000]    | 0.000<br>.<br>[0.000,0.000]         | -0.108<br>0.3835<br>[-0.352,0.135]    |
| Somalian           | 0.000<br>.<br>[0.000,0.000]          | 0.000<br>.<br>[0.000,0.000]         | 0.194**<br>0.0119<br>[0.043,0.345] | 0.027<br>0.7299<br>[-0.127,0.181]     | 0.348<br>0.6478<br>[-1.145,1.841]  | 0.083<br>0.4665<br>[-0.140,0.305]      | 0.000<br>.<br>[0.000,0.000]    | 0.000<br>.<br>[0.000,0.000]         | -0.246*<br>0.0795<br>[-0.521,0.029]   |
| Turkish            | 0.000<br>.<br>[0.000,0.000]          | -0.023<br>0.8351<br>[-0.238,0.192]  | -0.022<br>0.8394<br>[-0.233,0.189] | 0.130**<br>0.0131<br>[0.027,0.232]    | 0.000<br>.<br>[0.000,0.000]        | 0.075<br>0.4821<br>[-0.134,0.284]      | 0.000<br>.<br>[0.000,0.000]    | 0.000<br>.<br>[0.000,0.000]         | -0.402**<br>0.0311<br>[-0.767,-0.037] |
| Other              | 0.008<br>0.7395<br>[-0.038,0.054]    | 0.018<br>0.7509<br>[-0.094,0.130]   | 0.099*<br>0.0693<br>[-0.008,0.206] | -0.049<br>0.4241<br>[-0.170,0.072]    | 0.143*<br>0.0871<br>[-0.021,0.306] | -0.140*<br>0.0779<br>[-0.296,0.016]    | 0.000<br>.<br>[0.000,0.000]    | 0.000<br>.<br>[0.000,0.000]         | -0.052<br>0.4391<br>[-0.184,0.080]    |
| Control variables  |                                      |                                     |                                    |                                       |                                    |                                        |                                |                                     |                                       |
| Age                | 0.000<br>0.4629<br>[-0.001,0.001]    | 0.000<br>0.7845<br>[-0.003,0.004]   | 0.002*<br>0.0857<br>[-0.000,0.005] | -0.002*<br>0.0755<br>[-0.003,0.000]   | -0.001<br>0.8673<br>[-0.010,0.008] | -0.002<br>0.2533<br>[-0.005,0.001]     | -0.000<br>.<br>[-0.000,-0.000] | -0.004*<br>0.0861<br>[-0.008,0.001] | 0.001<br>0.3858<br>[-0.002,0.005]     |
| Female             | 0.014<br>0.4088<br>[-0.019,0.046]    | -0.008<br>0.8519<br>[-0.097,0.080]  | 0.066*<br>0.0960<br>[-0.012,0.143] | -0.038<br>0.3211<br>[-0.114,0.037]    | 0.328<br>0.6684<br>[-1.172,1.828]  | 0.095*<br>0.0646<br>[-0.006,0.195]     | 0.000<br>.<br>[0.000,0.000]    | -0.008<br>0.9354<br>[-0.190,0.175]  | -0.120**<br>0.0135<br>[-0.214,-0.025] |
| Oncological:yes    | 0.027<br>0.2088<br>[-0.015,0.069]    | 0.000<br>.<br>[0.000,0.000]         | 0.116**<br>0.0119<br>[0.026,0.207] | -0.144**<br>0.0440<br>[-0.284,-0.004] | 0.000<br>.<br>[0.000,0.000]        | -0.164**<br>0.0156<br>[-0.298,-0.031]  | 0.000<br>.<br>[0.000,0.000]    | 0.000<br>.<br>[0.000,0.000]         | 0.252***<br>0.0000<br>[0.153,0.350]   |
| History of ICU:yes | -0.268<br>0.9928<br>[-58.668,58.131] | 0.212***<br>0.0004<br>[0.094,0.331] | 0.031<br>0.6594<br>[-0.108,0.170]  | 0.035<br>0.5958<br>[-0.094,0.164]     | 0.000<br>.<br>[0.000,0.000]        | -0.279***<br>0.0071<br>[-0.483,-0.076] | 0.000<br>.<br>[0.000,0.000]    | 0.000<br>.<br>[0.000,0.000]         | 0.037<br>0.6326<br>[-0.115,0.190]     |
| ICU:yes            | 0.248<br>0.9934<br>[-58.151,58.647]  | -0.052<br>0.3191<br>[-0.155,0.051]  | -0.034<br>0.6517<br>[-0.182,0.114] | -0.061<br>0.3724<br>[-0.197,0.074]    | 0.000<br>.<br>[0.000,0.000]        | 0.141<br>0.1994<br>[-0.075,0.357]      | 0.000<br>.<br>[0.000,0.000]    | 0.000<br>.<br>[0.000,0.000]         | 0.059<br>0.4644<br>[-0.099,0.216]     |
| Days hospitalised  | -0.001<br>0.2310<br>[-0.001,0.000]   | -0.000<br>0.9146<br>[-0.001,0.001]  | -0.000<br>0.3494<br>[-0.001,0.000] | -0.001<br>0.2845<br>[-0.002,0.000]    | -0.006<br>0.2204<br>[-0.015,0.003] | 0.001**<br>0.0438<br>[0.000,0.002]     | 0.000<br>.<br>[0.000,0.000]    | -0.003<br>0.4559<br>[-0.010,0.005]  | 0.000<br>0.8371<br>[-0.001,0.001]     |
| Observations       | 330                                  | 252                                 | 390                                | 390                                   | 153                                | 390                                    | 70                             | 45                                  | 390                                   |

Notes: Values of b show the estimated marginal effects of logit models on the likelihood that the respective carbapenemases were detected, together with their p-value and confidence interval (95%). Baseline category for Ethnicity is German. Statistical significance level \*  $p < 0.10$ , \*\*  $p < 0.05$ , \*\*\*  $p < 0.01$ .
