# Supplementary material for: Global Distribution Patterns of Carbapenemase-Encoding Bacteria in a New Light: Clues on a Role for Ethnicity
Source: PubMed Central journal article supplement (PMC8276097; doi:10.3389/fcimb.2021.659753), 2021-06-29
Supplement: DataSheet_2.pdf [file DataSheet_2.pdf]

## Appendix C

### Tables

Table C1: Table summarizing sample date, MLST-type, ward and acquired resistance genes conferring decreased susceptibility against beta-lactam class antibiotics of sequenced KPC-encoding *Enterobacter cloacae* complex isolates.

| Isolate                             | Sample Date | MLST | Ward | BLRG                                                               |
|-------------------------------------|-------------|------|------|--------------------------------------------------------------------|
| <i>Enterobacter cloacae</i> complex | 15.05.2019  | 165  | A    | blaTEM-1A ; blaMIR-1, -5, -6 ; blaOXA-9, -10; blaKPC-2             |
| <i>Enterobacter cloacae</i> complex | 26.06.2019  | 419  | B    | blaCTX-M-9 ; blaTEM-1B ; blaOXA-1 ; blaKPC-2                       |
| <i>Enterobacter cloacae</i> complex | 30.06.2019  | 419  | C    | blaCTX-M-9 ; blaTEM-1B ; blaOXA-1 ; blaKPC-2                       |
| <i>Enterobacter cloacae</i> complex | 06.07.2019  | 419  | D    | blaCTX-M-9 ; blaTEM-1B ; blaACT-14 ; blaOXA-1 ; blaKPC-2           |
| <i>Enterobacter cloacae</i> complex | 12.07.2019  | 419  | D    | blaCTX-M-9 ; blaTEM-1B ; blaACT-14 ; blaOXA-1 ; blaKPC-2           |
| <i>Enterobacter cloacae</i> complex | 14.07.2019  | 419  | B    | blaCTX-M-9 ; blaTEM-1B ; blaDHA-12 blaACT-14 ; blaOXA-1 ; blaKPC-2 |
| <i>Enterobacter cloacae</i> complex | 20.07.2019  | 419  | E    | blaCTX-M-9 ; blaTEM-1B ; blaACT-14 ; blaOXA-1 ; blaKPC-2           |
| <i>Enterobacter cloacae</i> complex | 21.07.2019  | 419  | D    | blaCTX-M-9 ; blaTEM-1B ; blaACT-14 ; blaOXA-1 ; blaKPC-2           |
| <i>Enterobacter cloacae</i> complex | 21.07.2019  | 419  | D    | blaCTX-M-9 ; blaTEM-1B ; blaACT-14 ; blaOXA-1 ; blaKPC-2           |
| <i>Enterobacter cloacae</i> complex | 01.08.2019  | 419  | F    | blaCTX-M-9 ; blaTEM-1B ; blaACT-14 ; blaOXA-1 ; blaKPC-2           |

Table C2: Table summarizing sample date, MLST-type, ward and OXA variant of sequenced OXA-48-like encoding *Klebsiella pneumoniae* isolates.

| Isolate                      | Sample Date | MLST | OXA Variant | Ward |
|------------------------------|-------------|------|-------------|------|
| <i>Klebsiella pneumoniae</i> | 02.01.2019  | 466  | 48          | G    |
| <i>Klebsiella pneumoniae</i> | 25.01.2019  | 101  | 181/32      | H    |
| <i>Klebsiella pneumoniae</i> | 25.01.2019  | 395  | 48          | I    |
| <i>Klebsiella pneumoniae</i> | 28.01.2019  | 16   | 181/32      | J    |
| <i>Klebsiella pneumoniae</i> | 20.02.2019  | 16   | 181/32      | K    |
| <i>Klebsiella pneumoniae</i> | 27.02.2019  | 1198 | 48          | L    |
| <i>Klebsiella pneumoniae</i> | 15.04.2019  | 16   | 48          | M    |
| <i>Klebsiella pneumoniae</i> | 13.05.2019  | 78   | 48          | O    |
| <i>Klebsiella pneumoniae</i> | 16.07.2019  | 48   | 48          | D    |
| <i>Klebsiella pneumoniae</i> | 17.08.2019  | 14   | 48          | P    |
| <i>Klebsiella pneumoniae</i> | 16.10.2019  | 3440 | 48          | B    |
| <i>Klebsiella pneumoniae</i> | 25.10.2019  | 2096 | 232         | L    |
